# Supplementary material for: Sea ice export through the Fram Strait derived from a combined model and satellite data set
Source: Copernicus journal article supplement (doi:10.5194/tc-2019-157), 2019-07-03
Supplement: Supplementary file [file tc-2019-157-AC2-supplement.pdf]

## Responses to referee #2

Interactive comment on “Sea ice export through the Fram Strait derived from a combined model and satellite data set” by Chao Min et al.

### ***General Comments:***

This paper extended the estimations of sea ice export through the Fram Strait to the melting seasons using the combined model and satellite thickness (CMST) data set, which assimilates CryoSat-2 and SMOS thickness products, as well as sea ice concentration data. The paper is well written and easy to follow. The CMST data and methods to calculate sea ice export are already published in previous studies. The novelty of this paper might be the sea ice export during the melt season. I expect more elaborate analysis and discussion about the uncertainties of the input data during the melt season, and their impact on the estimation of sea ice export. I suggest to consider this manuscript for further publication after more analysis and comparisons are presented in the revised version.

Dear Reviewer:

We would like to thank you for the helpful comments to improve this manuscript. We further compared the sea ice drift data from CMST with that derived from Sentinel-1 SAR images, which confirmed that CMST data have smaller errors than NSIDC sea ice drift data in the melt season. And we replotted the previous figures of the relative frequency using heat map for better visibility. To compare with other studies much more straightforward, we also added calculations for the 79°N gate and further provide the volume flux comparison in our manuscript with tracks.

Below, we repeat each comment and insert our replies in the text where revisions were made. All responses are in blue font for clarity of reading.

### **Specific comments:**

**Point 1:** P5 L126-128: What kind of interpolation method is used here?

**Response:** We use linear interpolation method to interpolate the sea ice data onto the outlet. And we added this point in our manuscript. (*please see P5 line 145-146 in our manuscript*)

**Point 2:** Section 3.1 validation of CMST data: Validation of sea ice drift: Since sea ice drift is the essential parameter in the calculation of sea ice flux, more comparison and analysis should be carried out about the uncertainty of CMST sea ice drift product, especially during the melt season where the uncertainty of sea ice drift is greatest. From fig. 1b, it is difficult to figure out how well CMST sea ice drift data fits to the NSIDC data along the gates. Why do you use NSIDC here for the comparison, not OSI SAF?

**Response:** We agreed that more comparison and analysis about CMST drift data are necessitated. (please P4 section 2.4 and P6 section 3.1 line 174-191)

(1) The reason why we choose NSIDC drift for comparison is that during this study period (from September 2010 to December 2016) only the NSIDC sea ice drift data covers all of the melt seasons, while the OSISAF sea ice drift data are only available in the freezing season. The 6 years' mean difference between CMST sea ice drift data and NSIDC drift data over the years would be more informative. In addition, we have compared the sea ice drift over the entire Fram Strait gate from CMST with that from OSISAF used in Ricker et al. (2018) in the previous manuscript (also shown in Figure 2d and Figure 7 in our manuscript with tracks). The comparison (Figure 1a and 1b below, also shown in Figure 2d and Figure 7 in our manuscript with tracks) shows that the CMST drift fits the OSISAF drift pretty well.

(2) Owing to the purpose of our manuscript is estimating the sea ice volume export through the Fram Strait, we then further compared the CMST drift data with a high-resolution Sentinel-1 SAR drift data (Muckenhuber et al., 2016; Muckenhuber et al., 2018). The Sentinel-1 SAR drift data are calculated as monthly mean sea ice velocities at 79°N from October 2014 to February 2016, and cover both melt season and freezing season. To show the performance of CMST sea ice drift data in the Fram Strait, the NSIDC sea ice drift data are also compared with the SAR drift data. Results (Figure 2c and 2d below, also shown in Figure 1c and 1d in our manuscript with tracks) show that the CMST data exhibit even smaller errors than NSIDC data.

(3) For better showing the difference between CMST drift data and NSIDC data, we removed the Figure 1b in the previous version of our manuscript and showed the 6 years' mean difference (Figure 2b below, also shown in Figure 1b in our manuscript with tracks) specifically in the Fram Strait where this study focuses on.

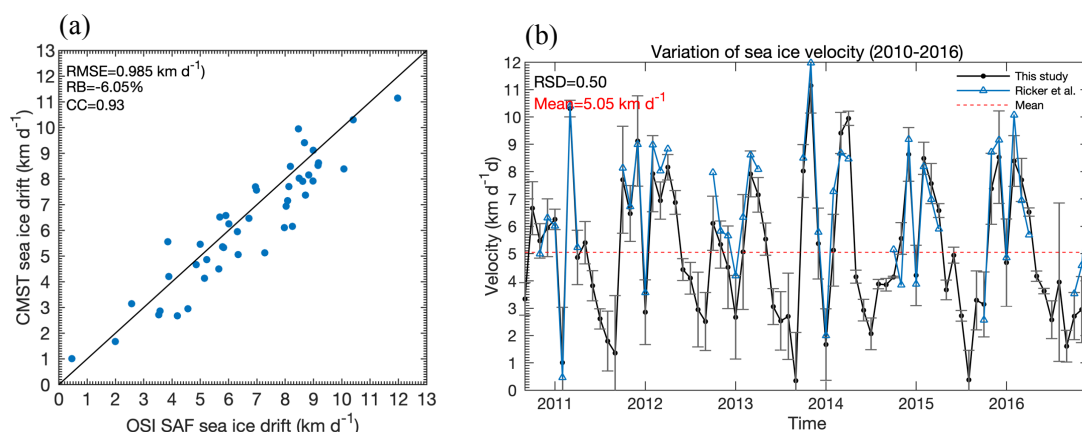

Figure 1. (a) Scatter plots of monthly average sea ice drift based on CMST and OSI SAF. (b) CMST sea ice drift averaged over the entire Fram Strait gate, from September 2010 to December 2016. The black dotted line represents monthly mean ice drift based on CMST data with corresponding standard deviations while the blue dotted line shows the monthly mean ice drift of OSI SAF.

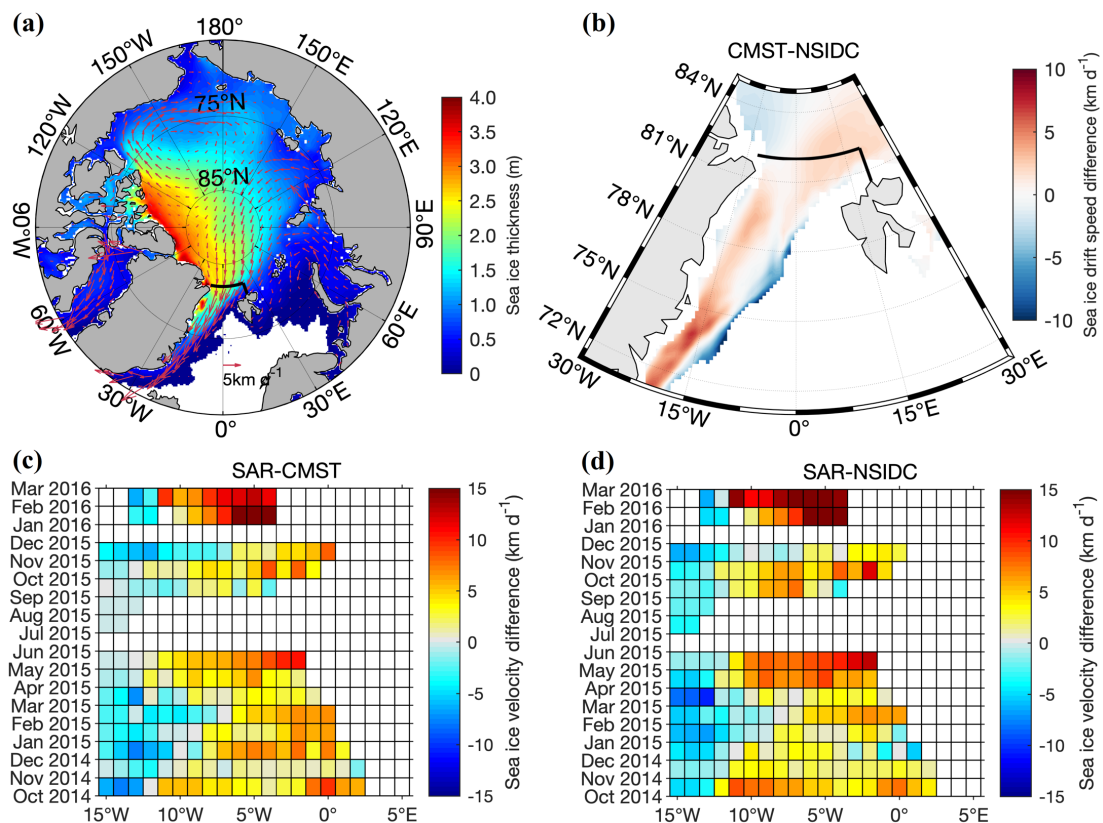

Figure 2. (a) The mean CMST sea ice drift and thickness averaged from September, 2010 to December, 2016. (b) The differences between CMST drift and NSIDC drift, the background color represents the magnitudes of ice velocity difference during the same period. The thick black line represents zonal and meridional sea ice gates to derive sea ice volume flux through the Fram Strait. (c) Meridional velocity difference between SAR drift and CMST drift at the Fram Strait (79 °N). (d) Meridional velocity difference between Sentinel-1 SAR drift and NSIDC drift at the Fram Strait (79 °N).

**Point 3:** P6L160-161 please add a short description about the domain (is it the Fram Strait gate?), time period used, etc.

**Response:** The monthly mean CMST drift data are calculated over the entire Fram Strait gate defined in this study. And it is compared with the OSI SAF sea ice drift data used in Ricker et al., (2018) within the same period from September 2010 to December 2016 and same domain defined before. We further added this information in the manuscript. (please see P7 line 196-198 in our manuscript with tracks)

**Point 4:** P6L155: what do you mean with “within the current understanding”?

**Response:** We rewrote our sentence as ‘*The mean sea ice thickness is distributed as expected (Tilling et al., 2015; Kwok et al., 2018), i.e., the relatively thicker ice, which is more than 2.5 m, mainly distributes in the north of Greenland and the Canadian Arctic Archipelago and the sea ice becomes thinner towards the Eurasia coasts. (Figure 1a)*’. (please see P6 line 172-174 in our manuscript with tracks)

**Point 5:** P7 L204: “moderate decline” during the 6 years?

**Response:** We realized that it is ambiguous previously. We changed the sentence to

*‘The analysis of ice concentration shows a steadily low values in the melt season’.*  
*(please see P8 line 242-243 in our manuscript with tracks)*

**Point 6:** P7 L212-213: Please define the relative frequency used here. Fig. 8 and 9: It might be helpful to add the mean ice thickness/ice drift of each season in the figures.

**Response:**

(1) The relative frequency (RF) is defined as following:

$RF = n / N_{\text{grids}}$ , where  $n$  represents the number of the grid cells in different thickness bins, and  $N_{\text{grids}}$  is the sum of  $n$  over all the bins.

(2) To better present the relative frequency of sea ice thickness and drift distribution in Fig. 8 and 9 in the previous manuscript (*now shown in Figure 8 and 9 in our manuscript with tracks*), we used the heat maps to show the information instead, which are also shown in the following Figure 2 and 3. Instead of adding the mean ice thickness/ice drift of each season in the figures, we text it *in our manuscript with tracks in P9 line 263-265 and line 272-274* as:

- In statistics, the seasonal mean sea ice thickness are 2.06 m for spring, 2.11 m for summer, 1.32 m for autumn and 1.43 m for winter over the entire outlet, respectively.
- The seasonal mean sea ice velocity over the entire gate is larger than 5 km d<sup>-1</sup> except that is 3 km d<sup>-1</sup> in summer.



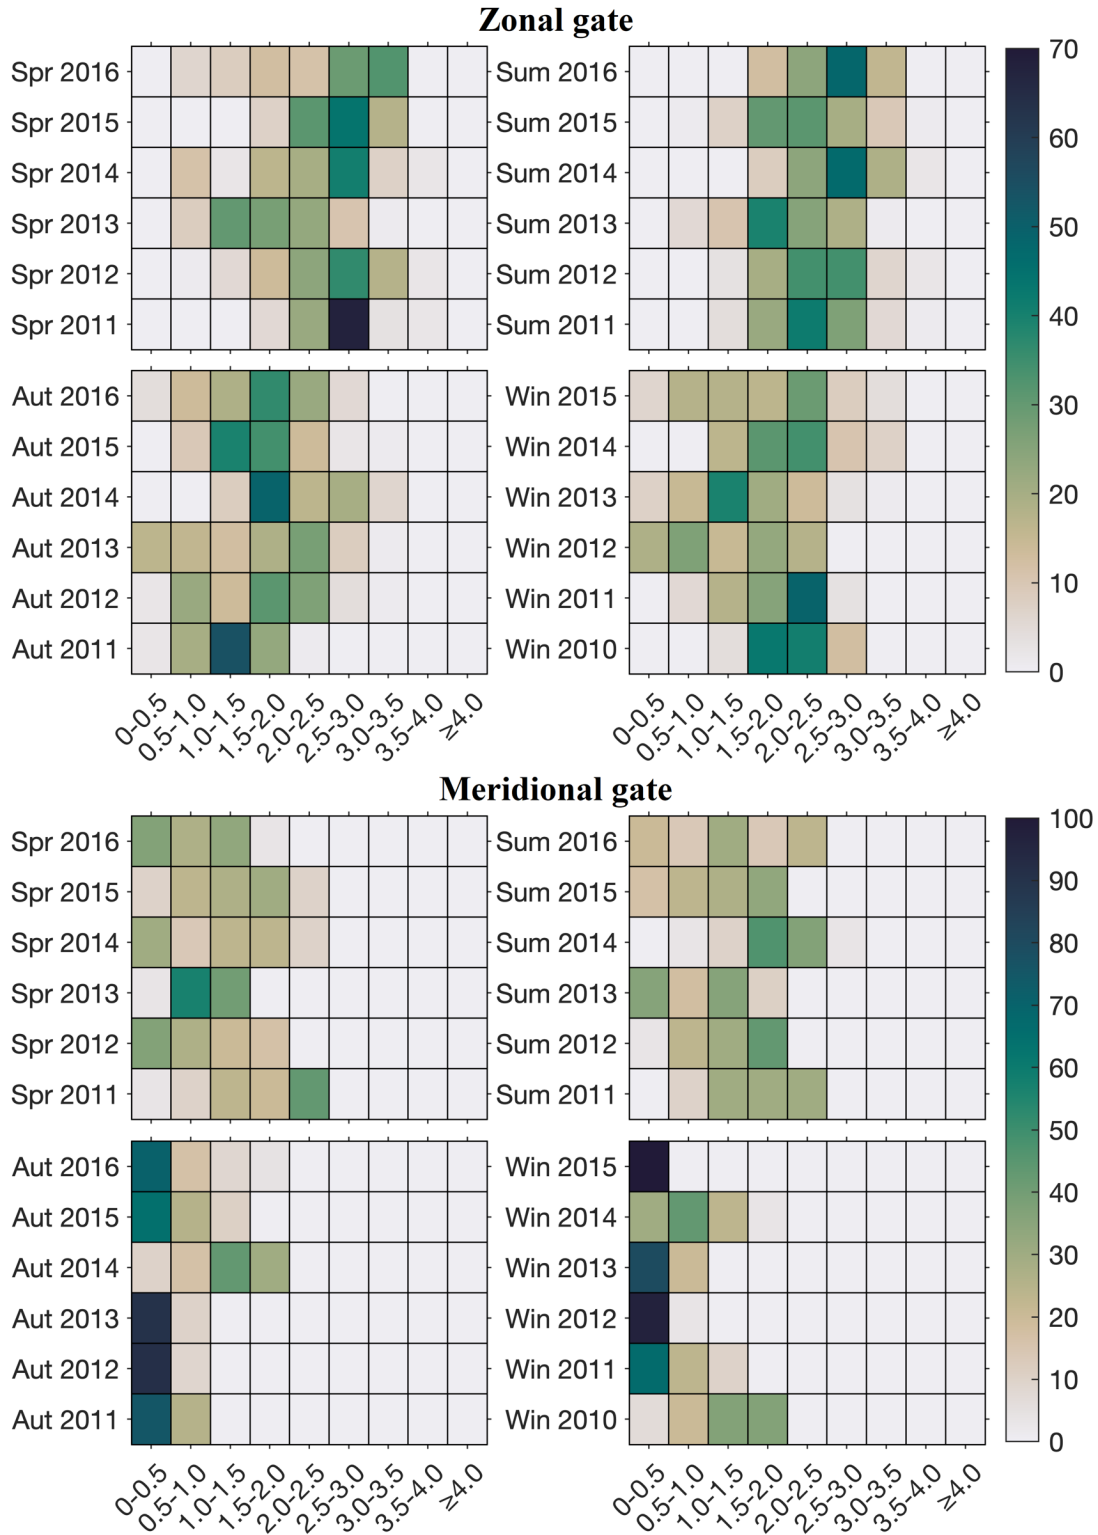

Figure 2. Seasonal variation of relative frequency (unit: %) of CMST sea ice thickness (unit: m) over the Fram Strait gate.

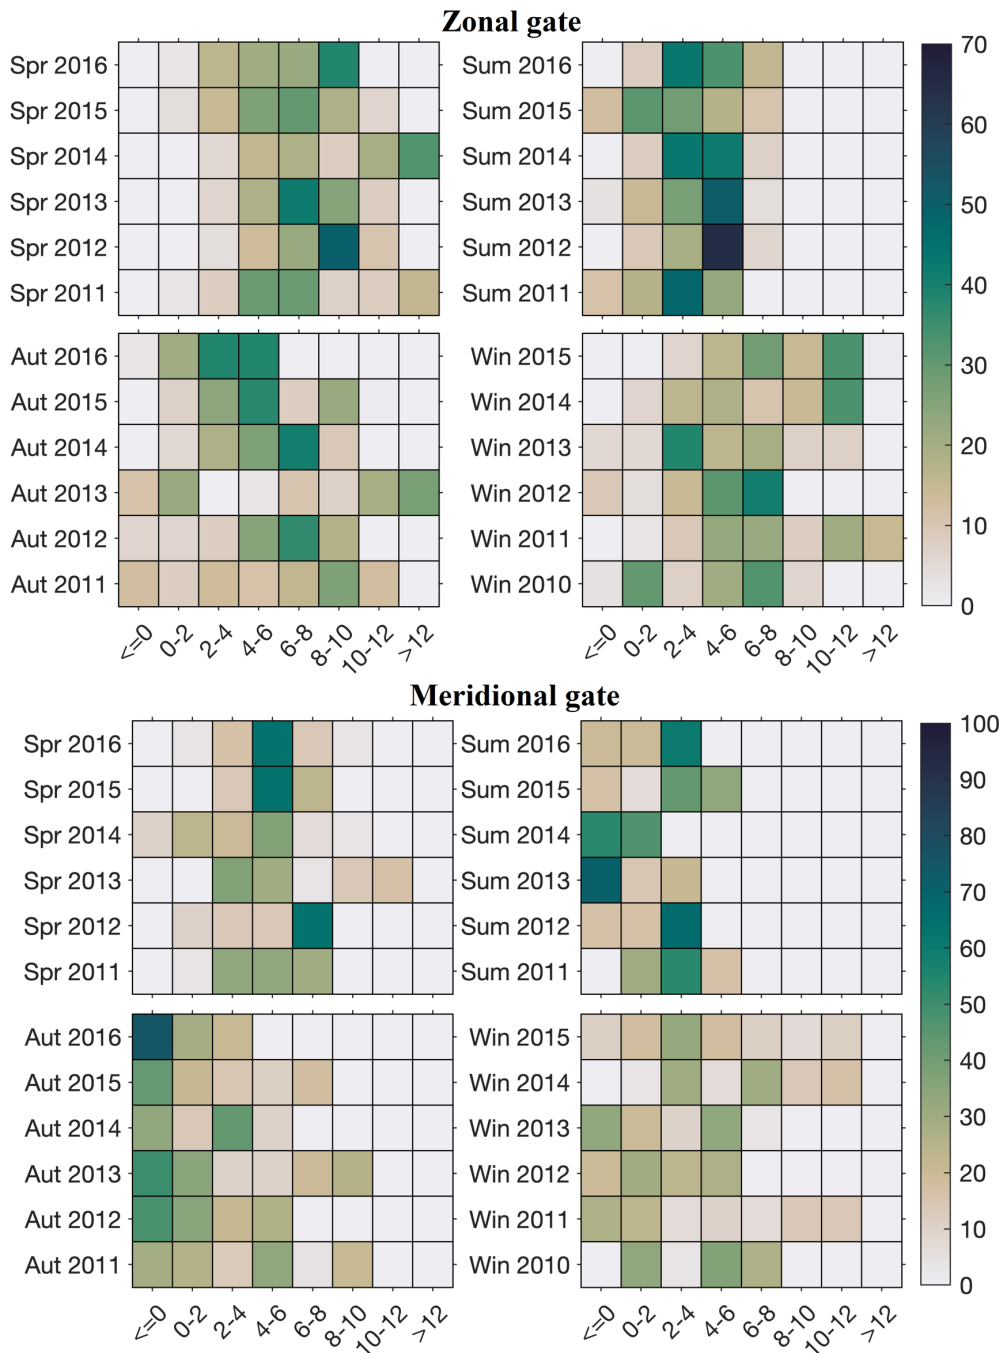

Figure 3. Seasonal variation of relative frequency (unit: %) of CMST sea ice drift (unit:  $\text{km d}^{-1}$ ) over the entire Fram Strait gate.

**Point 7:** P7 L214-218: Could you explain why ice thickness is thickest in summer and ice drift is slowest in summer?

**Response:** We want to specifically explain that the seasonal mean sea ice thickness (effective thickness), drift and relative frequency are calculated along the Fram Strait gate defined in this study.

(1) The ULS observation (Hansen et al., 2013) showed that the amount of sea ice thicker than 5 m is in a large amount in May 1977 (30%), July 1998 (34%), June 2003 (30%) and February 2006 (31%). The maximum monthly mean ice thickness appearing in

May-August (summer months) covers 10 months of the total 17 months (Table 2 in Hansen et al., 2013). Then the monthly mean ice thickness maximum in CMST usually occurs in July (Figure 4 in blow, also shown in Figure 5 in the manuscript) could be reasonable. Because the thick ice advects from the area north of Greenland and CAA to the Fram Strait in summer, which can be easily observed from the daily spatial distribution of the thickness and also from the daily ice-age product from NASA ([Arctic Sea Ice Age rev1.2160p30](#)). However, this is not always the case, thus not all the summer ice is thicker than other months. The other reason can be rooted in the melt of the thin ice fraction. Figure 2 shows that, in summer, the 0-1 m fraction is almost gone due to melting, while it is well present in autumn and winter. Therefore, this will of course also affect the mean ice thickness distribution then.

In CMST, the seasonal sea ice thickness averaged over 6 years over ice covered area is 2.06 m for spring and 2.11m for summer. The summer ice is only slightly thicker than ice in spring in statistics. We realize that the expression in our previous manuscript was not proper and besides we find that the definition of different seasons in our study could also affect the robustness of this conclusion. We then refine this sentence to: *“Thin ice is more observed in Autumn and winter over the zonal gate according to the RF distribution in Figure 9. Although the maximum thickness over the entire Fram Strait occurs in May and June (Figure 5), higher RF in thick ice bins are found in summer (June, July and August in our definition) over zonal gate. Over the meridional gate, the ice thickness in summer and spring is almost uniformly distributed, while in August and Winter, high RFs are more found in thin ice bins. In statistics, the seasonal mean sea ice thickness are 2.06 m for spring, 2.11 m for summer, 1.32 m for autumn and 1.43 m for winter over the entire outlet, respectively.”* (please see P9 line 259-269 in our manuscript with tracks)

(2) The sea ice velocity through the Fram Strait has high correlation with the cross-strait pressure gradient. The pressure gradient in summer is usually small, and thus results in slowest ice drift. This phenomenon has been investigated in previous studies (Kwok et al., 1999; Kwok et al, 2004; Vinje et al., 1998).

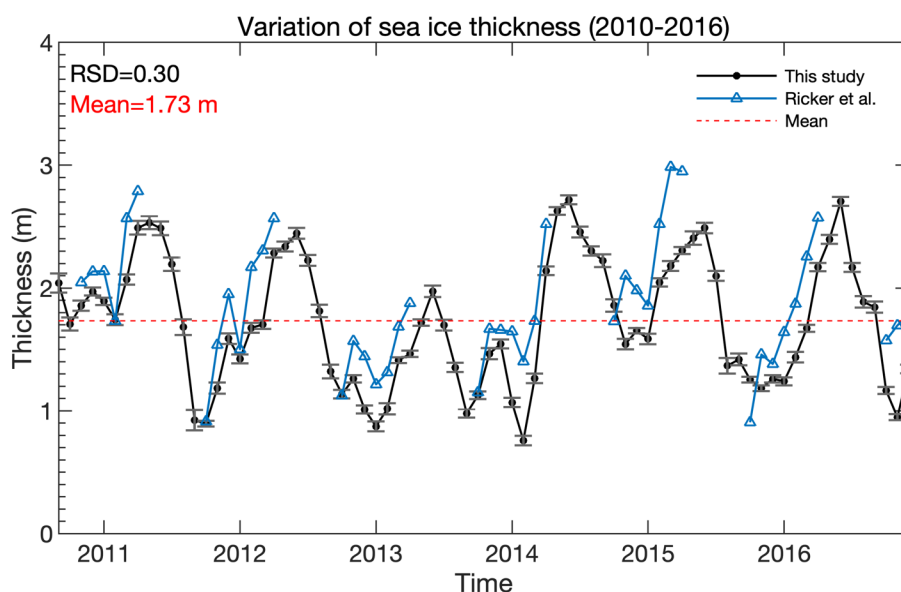

Figure 4. CMST sea ice thickness averaged over the entire Fram Strait gate, from September 2010 to December 2016. The black dotted line denotes monthly mean ice thickness based on CMST data with corresponding standard deviations while the blue dotted line represents monthly mean effective sea ice thickness of Ricker et al. (2018).

**Point 8:** P8 L224-225: better to mention this earlier in section 2.6.

**Response:** We mentioned this earlier in section 2.6 as suggested. (*please see P5 line 148-149*)

**Point 9:** Section 3.3 Sea ice volume export through the Fram Strait: It might be interesting to analyze the respective contributions of ice drift and ice thickness to the seasonal variation of sea ice export. How many percent of sea ice export variation can be explained by ice drift/ice thickness? More discussions could be made about the causes of the variations of ice drift, ice thickness and ice export during the melt season, e.g. what is the reason of the extreme low ice export in August 2015? Authors could also do some additional comparisons with atmospheric circulation variability, e.g. the Arctic Oscillation indices.

**Response:** Thank you for this suggestion. (*please see P10 line 299-316*)

(1) Following Ricker et al. (2018), we calculated the individual contribution of ice drift and ice thickness to the sea ice volume export. The correlation of determination ( $R^2$ ) in the below Figure 5 (*also shown in Figure 11 in the manuscript with tracks*) shows that the sea ice drift variation contributions much more to the sea ice flux variation. However, the seasonal averaged drift and thickness are smoothed especially for sea ice drift variation. It is then not surprised that, in the seasonal time scale, we get nearly the same contribution from the sea ice drift and thickness with  $R^2$  ranging between 0.36 and 0.46.

(2) The reason for the extremely low ice export in August 2015 is due to the rather smaller sea ice velocity (shown in Figure 5 below, *also shown in Figure 11 in our manuscript with tracks*).

(3) As suggested, we analyze the relations between atmospheric circulation (AO and NAO) and seasonal sea ice volume export through the Fram Strait (shown in Figure 6, *also shown in Figure 12 in our manuscript with tracks*). Results show that the correlation ( $r = 0.55$ ) between AO index and ice volume flux is higher than  $r(Q, NAO) = 0.34$ . Both of our study and Ricker et al. (2018) find that AO may play a more important impact on the sea ice export (2011-2016) though the correlations in this study are smaller than that Ricker et al., (2018) since they are calculated during freezing season in their study.

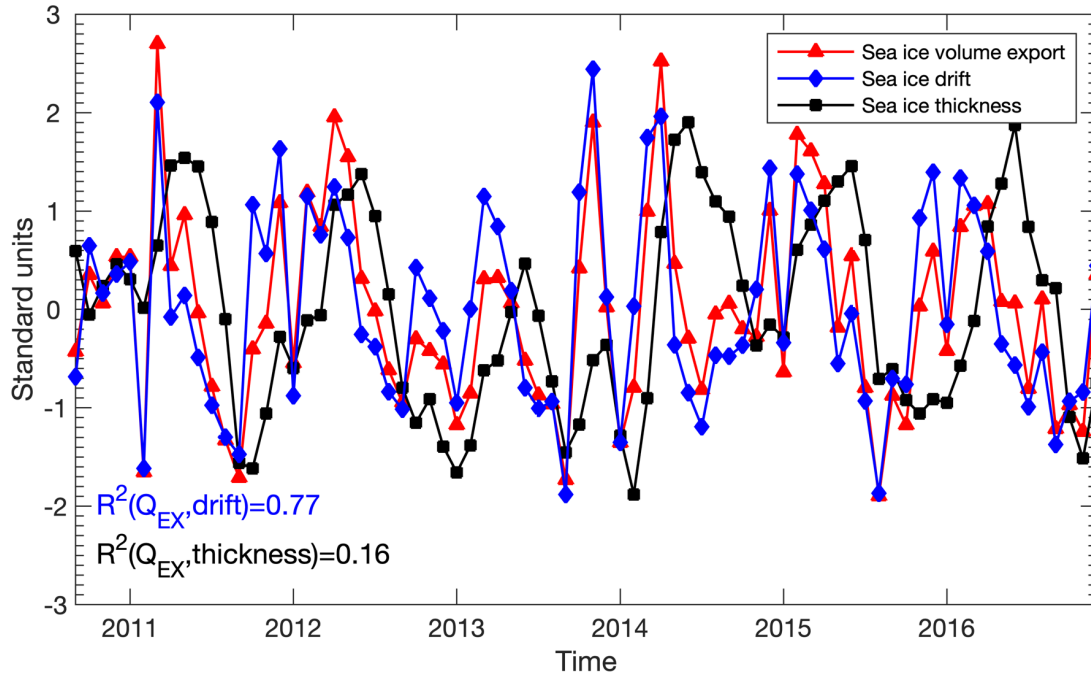

Figure 5. Time series of standardized monthly mean sea ice volume export (red line) and corresponding monthly mean sea ice drift (blue line) and sea ice thickness (black line), including correlation of determination ( $R^2$ ).

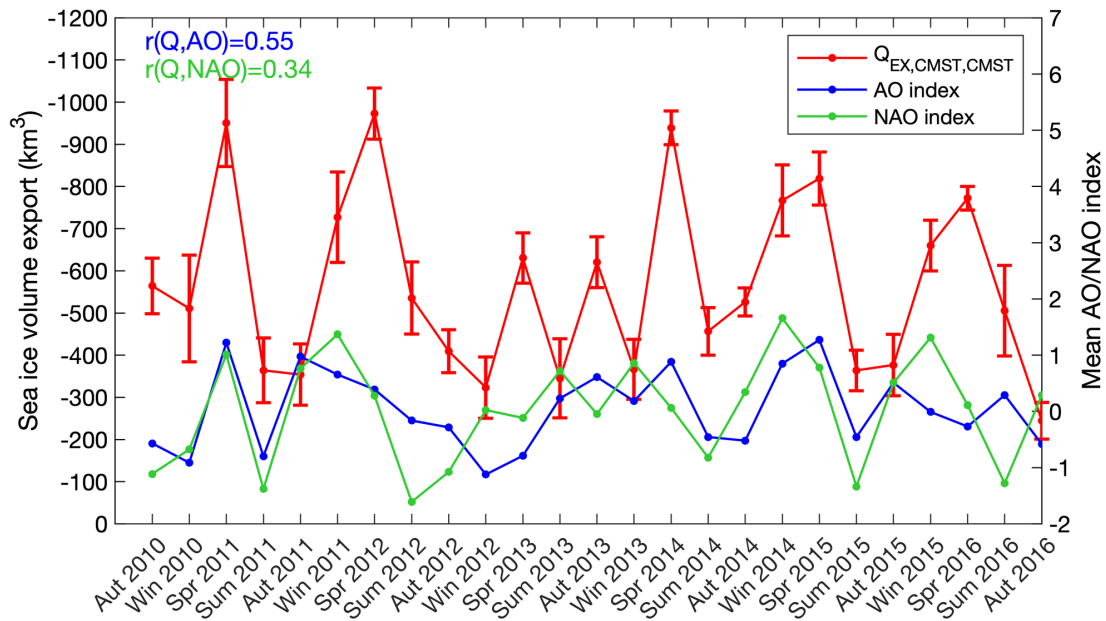

Figure 6. Time series of seasonal mean sea ice volume export (unit:  $\text{km}^3$ , red line) and corresponding mean seasonal AO (blue line) and NAO (green line) index, including correlation coefficient ( $r$ ).

**Point 10:** P8 L243:  $1503 \pm 158 \text{km}^3$  minus sign is missing. P10 L286: the values should have minus signs? P11 L315-316 and L319-320 are the same sentences.

**Response:** We checked through our manuscript and added the missing minus sign.

### Reference

Hansen, E., Gerland, S., Granskog, M. A., Pavlova, O., Renner, A. H. H., Haapala, J.,

- Løyning, T. B., and Tschudi, M.: Thinning of Arctic sea ice observed in Fram Strait: 1990–2011, *J. Geophys. Res-Oceans.*, 118, 5202-5221, doi:10.1002/jgrc.20393, 2013.
- Muckenhuber, S., Korosov, A. A., and Sandven, S.: Open-source feature-tracking algorithm for sea ice drift retrieval from Sentinel-1 SAR imagery, *Cryosphere*, 10, 913-925, doi:10.5194/tc-10-913-2016, 2016.
- Muckenhuber, S. and Sandven, S.: Sea ice drift data for Fram Strait derived from a feature-tracking algorithm applied on Sentinel-1 SAR imagery, *Data in Brief*, 18, 1410-1415, doi: 10.1016/j.dib.2018.04.034, 2018.
- Kwok, R., Cunningham, G. F., and Pang, S. S.: Fram Strait sea ice outflow, *J. Geophys. Res-Oceans.*, 109, doi:10.1029/2003JC001785, 2004.
- Kwok, R. and Rothrock, D. A.: Variability of Fram Strait ice flux and North Atlantic Oscillation, *J. Geophys. Res-Oceans.*, 104, 5177-5189, doi:10.1029/1998JC900103, 1999.
- Ricker, R., Girard-Ardhuin, F., Krumpen, T., and Lique, C.: Satellite-derived sea ice export and its impact on Arctic ice mass balance, *Cryosphere*, 12, 3017-3032, doi:10.5194/tc-12-3017-2018, 2018.
- Vinje, T., Nordlund, N., and Kvambekk, Å.: Monitoring ice thickness in Fram Strait, *J. Geophys. Res-Oceans.*, 103, 10437-10449, doi:10.1029/97JC03360, 1998.



# Sea ice export through the Fram Strait derived from a combined model and satellite data set

Chao Min<sup>1,2,3</sup>, Longjiang Mu<sup>4</sup>, Qinghua Yang<sup>1,2,3</sup>, Robert Ricker<sup>4</sup>, Qian Shi<sup>1,3</sup>, Bo Han<sup>1,3</sup>, Renhao Wu<sup>1,3</sup>, Jiping Liu<sup>5</sup>

5 <sup>1</sup>School of Atmospheric Sciences and Guangdong Province Key Laboratory for Climate Change and Natural Disaster Studies, Sun Yat-sen University, Zhuhai, 519082, China

<sup>2</sup>State Key Laboratory of Numerical Modeling for Atmospheric Sciences and Geophysical Fluid Dynamics, Institute of Atmospheric Physics, Chinese Academy of Sciences, Beijing, 100029, China

<sup>3</sup>Southern Marine Science and Engineering Guangdong Laboratory (Zhuhai), Zhuhai, 519082, China

10 <sup>4</sup>Alfred Wegener Institute, Helmholtz Centre for Polar and Marine Research, Bremerhaven, 27570, Germany

<sup>5</sup> Department of Atmospheric and Environmental Sciences, University at Albany, State University of New York, New York, 12222, US

*Correspondence to:* Longjiang Mu (longjiang.mu@awi.de)

**Abstract.** Sea ice volume export through the Fram Strait plays an important role on the Arctic freshwater and energy redistribution. The combined model and satellite [sea ice](#) thickness (CMST) data set assimilates CryoSat-2 and Soil Moisture and Ocean Salinity (SMOS) thickness products together with satellite sea ice concentration. The CMST data set closes the gap of stand-alone satellite-derived sea ice thickness in summer, and therefore allows us to estimate sea ice volume export during the melt season. In this study, we first validate the CMST data set using field observations, and then estimate the continuous seasonal and interannual variations of Arctic sea ice volume flux through the Fram Strait from September 2010 to December 2016. The results show that seasonal and interannual sea ice volume export vary from [about -2404 \(±4340\)](#) to [-973-970 \(±5960\)](#) km<sup>3</sup> and [-1974-1970 \(±291290\)](#) to [-2491-2490 \(±280\)](#) km<sup>3</sup>, respectively. The sea ice volume export reaches its maximum in spring and the mean amount of the melt season ice volume export accounts about one third of the yearly total amount. The minimum monthly sea ice export is [-11-11](#) km<sup>3</sup> in August 2015 and the maximum ([-442-442](#) km<sup>3</sup>) appears in March 2011. ~~The seasonal relative frequencies~~[Seasonal variations of sea ice thickness and drift infer show that the sea ice thicker ice than 2 m accompanied with slower ice motion is more easier to appear in the majority when there is sea ice exporting through along the Fram Strait outlet in summer.](#) ~~The seasonal relative frequencies of sea ice thickness and drift suggest that~~ [the Fram Strait outlet in summer is dominated by sea ice thicker than 2 m moving slow with velocities of about 3km d<sup>-1</sup>.](#)

## 1 Introduction

The sea ice extent and volume in the Arctic region ~~that are sensitive to global climate change are persistently undergoing~~[undergo](#) a decline for the past ~~several~~ decades and will likely continue to decrease ~~since the start of 21st century~~ (Comiso and Hall, 2014; Meier et al., 2014; Stroeve and Notz, 2015). The decline of ice extent changes the surface albedo, and as a consequence, the absorption of solar shortwave radiation increases. The variability of ice volume, however, exerts

influence on heat, freshwater budget and weather systems in the lower latitudes (Gregory et al., 2002; Tilling et al., 2015). Correspondingly, both the thermodynamic processes and dynamic processes can ~~impact~~ affect Arctic sea ice mass budget (Ricker et al., 2018). ~~T-Generally,~~ the sea ice outflow driven by atmospheric circulation is an important component of dynamic processes. The Fram Strait serves as the primary outlet of the Arctic sea ice export (Krumpfen et al., 2016). Moreover, the ice outflow through the strait into the Nordic Seas covers approximately 25% of the total Arctic freshwater export (Lique et al., 2009; Serreze et al., 2006).

Variations of satellite-based Arctic sea ice volume and sea ice export through the Fram Strait have been estimated by numerous studies (Bi et al., 2018; Kwok and Cunningham, 2015; Ricker et al., 2018; ~~Ricker et al., 2017~~; Spreen et al., 2009). Nevertheless, with respect to the volume flux, the primary focus of these studies are the variations during the winter season (October-April). This is mainly due to the limitations in retrieving sea ice thickness and motion by satellite remote sensing during the melt season (May-September). It is mainly caused by more melt ponds and saturated water vapor in the sea ice surface, which restrains satellite-based ice thickness limited to the cold season only (Mu et al., 2018a). The speed-up of sea ice drift usually accompanies with thin summer sea ice, meanwhile the faster sea ice drifts the larger retrieving errors there would be (Spreen et al., 2011; Sumata et al., 2014). Melting sea ice with a less scattering surface could significantly suppress the signal-to-noise ratio and obstruct the employment of satellite imagery to retrieve ice drift. For above-mentioned reasons, the spaceborne sea ice drift data usually induce much more uncertainties in the melt season. All these deficiencies make the estimate of the Arctic sea ice thickness and drift variations all year round difficult with only satellite sea ice data.

Sea ice volume flux, compared to area flux, could reflect the sea ice mass balance in a more comprehensive way. However, the amounts of Fram strait sea ice volume export during the winter season do not demonstrate a conspicuous growth or decline trend (Ricker et al., 2018; Spreen et al., 2009). And the variation of the melt season ice volume flux through the Fram Strait still remains a query owing to the fact that sea ice thickness observations are sparse in the melt season, and so does the yearly total amount of ice volume flux. In terms of sea ice volume flux, Ricker et al. (2018) ~~and~~, Bi et al. (2018) and Zamani et al. (2019) point out that the variation of ice drift plays the major role in determining the annual and interannual ice volume export variability. Due to thermodynamic growth and deformation, the sea ice thickness on the other hand drives the increase in the seasonal cycle of exported volume. For this reason, an accurate data set of sea ice drift and thickness is crucial to better estimate sea ice volume output. However, the limitations of spaceborne sea ice thickness and drift data during the melt season poses a great challenge to derive the sea ice flux.

Employing the benefits of both the CryoSat-2 (CS2) and the Soil Moisture and ocean Salinity satellite (SMOS) sea ice thickness products, the new data set (combined model and satellite thickness, CMST) that assimilates these data together with satellite-derived sea ice concentration (Mu et al., 2018a; Mu et al., 2018b) provides the daily sea ice thickness, concentration and drift estimates simultaneously. Moreover, taking advantages of model dynamics and sea ice concentration assimilation, the new sea ice data set extends to cover the melt season when satellite data are limited (Mu et al., 2018a). Previous results reveal that CMST data even have some advantages among the statistically merged satellite data CS2SMOS and Pan-Arctic Ice-Ocean Modelling and Assimilation System (PIOMAS) thickness product when comparing with the in-situ observations (Mu et al.,

2018a). Therefore, the CMST sea ice product enables to examine the all-year-round changes in sea ice volume export through the Fram Strait for 2010-2016, during a time when Arctic sea ice is undergoing dramatic changes. Further, we also calculate the sea ice thickness, concentration and drift frequency distributions along the main sea ice export gate all-year-round.

70 This paper is organized as follows. Section 2 describes the data used to derive volume flux and validate the CMST data, including CMST data set, OSISAF ~~and~~, NSIDC ~~sea ice drift data~~, and ~~Sentinel-1 SAR sea ice drift~~, HEM sea ice thickness and ULS thickness. In section 3, firstly, we evaluate the performance of CMST data. Then, we estimate the continuous seasonal and interannual variation of sea ice thickness, concentration and drift in the Fram Strait. Also, the all-year-round variability of sea ice volume export through the Fram Strait is calculated. Uncertainty in our volume flux estimate is discussed in Section 4.

75 Concluding remarks are given in Section 5.

## 2 Data and Methods

### 2.1 CMST sea ice data

The ~~new~~-CMST ~~sea ice data in addition to ice thickness and concentration also comprise~~ ~~provide~~ the modelled ice drift velocities. The estimation data are generated by an Arctic regional ice-ocean model accompanying with CS2, SMOS sea ice thickness and SSMIS sea ice concentration assimilated. This Arctic regional model (Losch et al., 2010; Mu et al., 2017; Nguyen et al., 2011; Yang et al., 2014) is configured on the basis of the Massachusetts Institute of Technology generation circulation model (MITgcm) (Marshall et al., 1997). To reflect the impacts of atmospheric uncertainties on the sea ice data assimilation, the atmospheric ensemble forecasts of the United Kingdom Met Office (UKMO) Ensemble Prediction System (EPS; <http://tigge.ecmwf.int>) are used as atmospheric forcing (Mu et al., 2018b; Yang et al., 2015; Yang et al., 2016). The Parallel Data Assimilation Framework (PDAF) is applied to assimilate satellite thickness (e.g., SMOS thickness data thinner than 1 m and weekly mean CS2 thickness data) and concentration data (provided by the Integrated Climate Data Center, <http://icdc.cen.uni-hamburg.de>). More details about this assimilation process can be found in previous studies (Mu et al., 2018a; Mu et al., 2018b). CMST provides grid cell-averaged ice thickness, i.e., the effective ice thickness (Mu et al., 2018a; Schweiger et al., 2011) with a resolution about 18 km. Further taking advantage of model dynamics and ice concentration assimilation, the daily CMST thickness data in summer are also available from October 2010 to December 2016. Although the time span of CMST data do not contain the recent two years (e.g.i.e., year of 2017 and 2018), it does cover the year of the lowest sea ice extent record at that time (e.g.i.e., 2012 and 2016) (Parkinson and Comiso, 2013; Petty et al., 2018).

### 2.2 OSI SAF drift data

As suggested by Sumata et al. (2014), the merged OSI SAF sea ice drift product (OSI-405) reveals a better performance than other ~~low-resolution~~ sea ice drift ~~data sets~~ ~~products~~ in the Fram Strait. Thus, we use it for comparison with CMST drift data when calculating sea ice volume export. The merged drift data can be downloaded from the Ocean and Sea Ice Satellite Application Facility (OSI SAF, <http://www.osi-saf.org/?q=content/sea-ice-products>). The merged drift products are retrieved

from multiple sensors and channels (shown in Table 1) in order to supplement data gaps in the single-sensor products. A more detailed description can be seen in the Low Resolution Sea ice Drift Product User's Manual (100 [http://osisaf.met.no/p/ice/lr\\_ice\\_drift.html](http://osisaf.met.no/p/ice/lr_ice_drift.html)).

### 2.3 NSIDC sea ice drift

The latest released Polar Pathfinder Daily 25 km EASE-Grid sea ice drift data from the National Snow and Ice Data Center (NSIDC, <https://nsidc.org/data/nsidc-0116/versions/4>) are used to evaluate the CMST drift too. These data cover both the melt season and the freezing season and widely used in the modeling and data assimilation (Miller et al., 2006; Stark et al., 2008). 105 The input sea ice motion data sets are obtained from AVHRR, AMSR-E, SMMR, SSM/I, SSM/I, International Arctic Buoy Program (IABP) buoys and National Center for Environmental Prediction (NCEP) / National Center for Atmospheric Research (NCAR) Reanalysis wind data. More descriptions can be seen in the NSIDC ice motion user guide (<https://nsidc.org/data/nsidc-0116/versions/4>).

### 2.4 Sentinel-1 SAR sea ice drift ~~HEM sea ice thickness~~

110 ~~For For~~To further validate the CMST sea ice drift in the Fram Strait, the sea ice drift data retrieved from Sentinel-1 Synthetic Aperture Radar (SAR) images are used as the reference products (<https://www.ncbi.nlm.nih.gov/pmc/articles/PMC5999601/>). Based on the different polarization channels, thousands of HH and HV polarization images are calculated as monthly mean sea ice drift at 79°N along the gate from 15°W to 5°E (Muckenhuber et al., 2018). These SAR drift data are derived by an open-source feature-tracking algorithm (Muckenhuber et al., 2016). Owing to the better performance of the HV polarization 115 channel (Muckenhuber et al., 2016), we only use the southward velocity component of HV polarization for the validation purpose. More information about ~~thesethe~~ Sentinel-1 SAR sea ice drift can be obtained in the previous studiesy (Muckenhuber et al., 2016; Muckenhuber et al., 2018), ~~the purpose of evaluating the performance of CMST sea ice thickness, the helicopter-borne electromagnetic induction~~

### ~~2.2.54~~ HEM sea ice thickness

120 For the purpose of evaluating the performance of CMST sea ice thickness, the helicopter-borne electromagnetic induction sounding (HEM) sea ice thickness (<https://data.npolar.no/dataset/1ed8c57e-8041-42fd-95bb-cfe4e181e9b8>) <https://www.nordatanet.no/en>) is utilized for intercomparison. This HEM measurement campaigns consist of 9 separate flights implemented in the Fram Strait from August to September, 2014. The helicopter-measured sea ice thickness is named as “total thickness” including snow layer. Thus, following Krumpfen et al. (2016), we assume the thickness of snow or weathered ice is 125 0.1 m, i.e., we subtract the 0.1 m snow thickness from the “total thickness” in the later calculation. Sea ice concentration is low in the operational areas during this period and the data have not been adjusted with sea ice concentration. Because the CMST model thickness are effective thickness (e.g., mean thickness over one model grid), for easy comparison, and as recommended by the data providers ([4](https://data.npolar.no/dataset/1ed8c57e-8041-42fd-95bb-</a></p></div><div data-bbox=)

[cfc4e181e9b8\)https://www.nordatanet.no/en](https://www.nordatanet.no/en)), -we adjust this data with the CMST ice concentration to obtain daily mean ice thickness.

### **2.2.65 ULS sea ice thickness**

The upward looking sonars (ULS) measurement (moored at 79°N, 5°W) in the Fram Strait is deployed and maintained by the Norwegian Polar Institute. ~~Since ULS measures sea ice draft, the derived sea ice thickness is less affected by uncertainties in derived from the ULS is rarely obscured by the snow layer depth and ice density-errors. So Moreover, the ULS provides year-round measurements and are therefore the ULS observed sea ice thickness is further~~ used to validate the CMST thickness. More details about the ULS data can be found in previous work (Hansen et al., 2013). In this study, ~~only we use a one year round a 1-year data set of monthly mean sea ice thickness. (from September, 2010 to August, 2011) monthly mean ULS sea ice thickness is used owing to the limited availability of this in situ observations.~~

### **2.2.76 Retrieving methods in sea ice volume export**

The sea ice thickness, concentration and drift in CMST data set are provided on the cube spherical Arakawa C grid with a resolution of 18 km. Both sea ice variables in CMST and the OSI-405 merged data are projected to the geographic coordinates at first. Following Krumpen et al. (2016) and Ricker et al. (2018), we define the Fram Strait export gate with zonal and meridional components as shown in Figure 1. The zonal gate is situated at 82°N between 12°W and 20°E, and the meridional gate is located at 20°E between 80.5°N and 82°N. The chosen gates are dedicated to decrease errors and bias in low resolution drift data and thickness data from satellite (Krumpen et al., 2016; Ricker et al., 2018). Secondly, we [use linear interpolation method to](#) interpolate the CMST data and OSI SAF data onto the zonal gate with a spatial resolution of 1° and the meridional gate with a spatial resolution of 0.15°, which is of the purpose to better match the model grids with the interpolated grids. Following Ricker et al. (2018), [we also define the negative values represent ice volume loss from the Arctic Basin through the outlet and](#) the sea ice volume flux can be estimated as following formulas:

$$Q_x = L_x H_x v, \quad (1)$$

$$Q_y = L_y H_y u, \quad (2)$$

where  $L_x$  is the size of zonal interpolated grid while  $L_y$  is the size of meridional interpolated grid.  $H_x$  and  $v$  are the interpolated effective ice thickness and [meridional](#) velocity at the zonal gate.  $H_y$  and  $u$  are the interpolated effective ice thickness and [zonal](#) velocity at the meridional gate. Note that ice concentration information is not involved in equations (1) and (2) because the calculation process of CMST model effective ice thickness has already taken ice concentration information into account.

The total sea ice volume export ( $Q_{EX}$ ) through the Fram Strait is obtained by adding the zonal ice volume flux ( $Q_x$ ) and meridional ice flux ( $Q_y$ ) together:

$$Q_{EX} = Q_x + Q_y, \quad (3)$$

Uncertainties of sea ice volume export ( $\delta_{Q_x}$ ) are evaluated as:

$$\delta_{Q_x} = L \sqrt{(H \delta_v)^2 + (v \delta_H)^2}, \quad (4)$$

This strategy is used to estimate the expected uncertainties of volume flux via the zonal gate.  $\delta_v$  and  $\delta_H$  represent ice drift uncertainty and ice thickness uncertainties, respectively. Expected sea ice volume flux uncertainties along the meridional gate can be determined by the similar method of (4).

Detailed sea ice volume export derived from CMST thickness and drift are represented by M2 in Table 2 (Section 3.2). The results derived from CS2 thickness and OSI SAF drift for Ricker et al. (2018) are represented by R. To investigate the flux biases (R vs M1) due to the existing deviations between the CMST and the CS2 thickness data, ice thickness from CMST and ice drift from OSI SAF are also used to calculate the flux ~~that is also~~ shown by M1.

### 3 Results

#### 3.1 validation of CMST data

170 Firstly, the field and satellite-based observations are used to evaluate the performance of CMST sea ice data in the Fram Strait. ~~Comparing +~~The mean sea ice drift and thickness of nearly 6 years' CMST data ~~(are shown in Figure 1a~~ to help understand the long term sea ice drift and thickness distribution. The mean sea ice thickness is distributed as expected (Tilling et al., 2015; Kwok et al., 2018), i.e., the relatively thicker ice, which is more than 2.5 m, mainly distributes in the north of Greenland and the Canadian Arctic Archipelago and the sea ice becomes thinner towards the Eurasia coasts- (Figure 1a). Then we  
175 We then compare the mean difference between the CMST drift and ~~)-~~ with the latest released sea ice drift data (V4) from the NSIDC. ~~For clearly presenting the differences in the Fram Strait where this study focuses on, the sea ice velocity difference map is shown in Figure 2b.C (shown in Figure 1b), We find that~~ The circulation patterns (the Transport Drift and the Beaufort Gyre) and magnitudes distributions of these two sea ice drift data (CMST vs. NSIDC) are both quite similar (Figure not shown). The relatively larger differences of sea ice velocity magnitudes drift speed occurs are found in the southwestern Greenland Sea along the coast of Greenland, which- ~~is shown in Figure 21b.~~ It is noticeable that the mean sea ice drift speed of CMST is larger than the NSIDC in most areas. This may suggest that the CMST sea ice drift performs better than NSIDC drift data in the Fram Strait for that NSIDC drift data usually exist underestimations in sea ice velocity (Sumata et al., 2015; Sumata et al., 2014). we find that the circulation patterns (the Transport Drift and the Beaufort Gyre) and magnitudes of these two sea ice drift data (CMST vs. NSIDC) are both quite similar. For further validation of CMST sea ice velocity, we compare the CMST  
180 southward velocities that affect sea ice volume flux with high-resolution Sentinel-1 SAR sea ice drift data. Results (Figure 1c and 1d) show that both CMST drift and NSIDC drift generally overestimate the southward velocities near the Greenland but underestimate the velocity far away from the Greenland. Although both two data sets present biases are found compared with  
185 with respect to SAR drift data, monthly mean CMST drift data still show a better performance than NSIDC drift data



190 especially near the Greenland. The relatively large difference of sea ice velocity magnitudes occurs in the southwestern Greenland Sea along the coast of Greenland. The mean sea ice thickness is distributed as expected and within the current understanding (Figure 1a). Further assessments of CMST thickness and drift data are shown in Figure 2. The geography map (Figure 2a) shows the trajectories of HEM measurement campaigns and the site of ULS. Helicopter-borne daily mean sea-ice thickness is first used to evaluate the CMST thickness data in the Fram Strait in this study. Monthly CMST sea ice thickness is also compared with the thickness derived from the ULS data (shown in Figure 2c). Note that the comparison period for CMST thickness and ULS thickness is from September 2010 to August 2011, since the ULS data afterwards have not been available for this study. Monthly mean CMST sea ice drift over the entire Fram Strait gate is evaluated with OSI SAF ~~(from drift used in~~ Ricker et al. (2018) ~~- within the same period from September 2010 to December 2016 and same domain defined before for comparison)~~ product. For quantitative metrics, correlation coefficient (CC), relative bias (RB) and root-mean-squared error (RMSE) are explored to quantify the comparison. These statistic metrics are calculated as follows (Chen et al., 2000 2013; Zhang et al., 2019):

$$CC = \frac{\text{Cov}(\text{CMST}, \text{observation})}{\sigma_{\text{CMST}} \sigma_{\text{observation}}}, \quad (5)$$

$$RB = \frac{\sum(\text{CMST} - \text{observation})}{\sum \text{observation}}, \quad (6)$$

$$RMSE = \sqrt{\frac{(\text{CMST} - \text{observation})^2}{N}}, \quad (7)$$

205 Statistical analysis between CMST and HEM sea ice thickness shows that the CC, RB and RMSE are 0.59, 15.13% and 0.66 m, respectively. Furthermore, statistics indicate that the CMST data is comparable to ULS measurements with a CC of 0.68, a low RB (1.74%) and RMSE (0.328 m). Note that the CMST thickness has been already quantitatively evaluated with more observation records by a previous study (Mu et al., 2018a) and exhibits some advantages over the widely used CS2SMOS and PIOMAS thickness data. The CC between CMST drift and OSI SAF drift shows a high correlation of 0.93 (Figure 2d) in the freezing season (October-April). The RB (-6.05%) and RMSE (0.985 km d<sup>-1</sup>) are also relatively quite low. These statistical 210 metrics suggest a good performance of CMST over the Fram Strait outlet in simulating the real sea ice drift and thickness.

### 3.2 Sea ice thickness, concentration and drift variation

For convenience, so we define the spring (March-May), summer (June-August), autumn (September-November) and winter (December-February) periods, respectively. The continuous and all-year-round covered seasonal variation of Arctic sea ice thickness and concentration are shown in Figures 3 and 4. During the study period, both the Arctic sea ice thickness and 215 concentration show a significant seasonal variation, e.g., the sea ice thickness reach its maximum in spring (except for 2013), while the sea ice concentration has a peak value in spring/winter.

As shown in Figure 3, the distribution of sea ice thickness along the Fram Strait zonal gate features thicker sea ice in the east of Greenland than that in the west of Svalbard, showing a gradually thinning trend from west to east. ~~And~~ along with the

meridional gate, sea ice is thickening from the northern Svalbard to the central Arctic Ocean. ~~This is, which is in line with~~  
220 ~~other studies on the topic~~ (Hansen et al., 2013; Kwok et al., 2004; Krumpfen et al., 2016; Vinje et al., 1998). Note that the sea  
ice thickness hits its minimum in the autumn of 2011, and such anomaly is also found in previous studies based on sea ice  
satellite data (Kwok and Cunningham, 2015; Tilling et al., 2015). Also, it is notable that the mean thickness of the winter 2013  
arises a significant thickening comparing with other winters. This remarkable thickening may be linked to the anomalously  
cooling in 2013 which enhances the thermodynamic ice growth (Tilling et al., 2015).

225 Further analysis on ~~the sea ice volume within the Arctic basin~~ ~~the Arctic sea ice volume (inside the Arctic circle)~~ shows a  
typical seasonal ~~and interannual~~ variations with the minimum in autumn and the maximum in spring. The Arctic sea ice volume  
undergoes a minimum season in the autumn of 2011 ( $6.93 \times 10^3 \text{ km}^3$ ) and reaches a maximum of  $20.19 \times 10^3 \text{ km}^3$  in the spring  
of 2014. The connection between the emerging time of maximum/minimum sea ice volume and extent is not particularly strong,  
for instance, the sea ice extent minimum ( $5.17 \times 10^6 \text{ km}^2$ ) happens in autumn of 2012 and the maximum of  $10.87 \times 10^6 \text{ km}^2$   
230 occurs in spring of 2013 while the sea ice volume minimum ( $6.93 \times 10^3 \text{ km}^3$ ) happens in autumn of 2011 and the maximum of  
 $20.19 \times 10^3 \text{ km}^3$  occurs in spring of 2014. The temporal variation trends of Arctic ice volume and extent are similar to the results  
from Tilling et al. (2015) and Kwok and Cunningham (2018).

The sea ice thickness, concentration and drift averaged over the entire Fram Strait gate are shown in Figures 5, 6 and 7,  
respectively. We also compare these sea ice variables with Ricker et al. (2018). The results show that the CMST ice thickness  
and drift are ~~slightly~~ smaller than that of CS2 and OSI SAF while the CMST ice concentration is a little larger than OSI SAF  
ice concentration. The underestimation of sea ice thickness in the Fram Strait is reasonable (Figure 6 in Mu et al., 2018b). The  
235 previous study shows that the mean Arctic-wide OSI SAF drift is slightly larger than IABP/D buoy ice drift (Sumata et al.,  
2014), which suggests the slight underestimation of CMST drift seems also tenable. Further validation with more ice drift data  
(e.g., ~~high resolution SAR drift data and~~ buoy drift data) is needed; however, it is beyond the scope of this work. In terms of  
240 variation trend, they are in good agreement with those of Ricker et al. (2018). As shown in Figures 5 and 7, the averaged sea  
ice thickness and drift reveal a significant seasonal cycle. That is, the variations of sea ice thickness and motion always  
accompany with spring augment and autumn decrease. The analysis of ice concentration shows a ~~steadily moderate decline~~  
~~low values~~ in the melt season. And the 6-year mean sea ice thickness, concentration and drift averaged over the entire Fram  
Strait gate are about 1.7 m, 85% and  $5 \text{ km d}^{-1}$ .

245 Following Ricker et al. (2018), the relative standard deviation ( $\text{RSD} = \text{SD}/\text{mean}$ ) is used to measure the effects of sea ice  
variables on volume output. Variables with a larger RSD contributes to a greater impact on the volume variation. As shown in  
Figures 5, 6 and 7, the RSD of ice thickness is 0.30 which is about twice of ice concentration (0.14). The RSD of ice drift is  
0.50 which is the largest contributor. ~~It is shown that This Consistent with previous studies conclusion, that the ice drift with~~  
~~maximal RSD is more likely to affect variations in sea ice volume flux, which is corresponding to the previous findings has~~  
250 ~~been pointed already in Kwok et al. (1999), Ricker et al. (2018) and Bi et al. (2018) such as Ricker et al. (2018) and Bi et al.~~  
~~(2018), the ice drift with maximal RSD is more likely to affect variations in sea ice volume flux.~~

To analyze the respective contributions of ice drift and ice thickness to the seasonal variation of sea ice export. For further analysis of the impacts on the seasonal variations of sea ice volume flux, we present also for However, when averaged overtime scale was. Whereafter, we calculate the The -frequency distributions of seasonal sea ice thickness (Figure 88), drift (Figure 9) and concentration (not shown owing to the minimum RSD) frequency distributions along the Fram Strait outlet are further calculated. Specifically, we define the relative frequency (RF) as following:

$$RF = \frac{n}{N_{\text{grids}}}, \quad (8)$$

where  $n$  represents the number of the grid cells accounted by the different thickness bins, and  $N_{\text{grids}}$  is the sum of  $n$  over all the bins. As suggested by Figure 88, the thickness along the zonal gate is much thicker than the meridional gate. Thin ice is more observed in Autumn and winter over the zonal gate according to the RF distribution in Figure 409. Although the maximum thickness over the entire Fram Strait occurs in May and June (Figure 5), higher RF in thick ice bins are found in summer (June, July and August in our definition) over zonal gate. Over the meridional gate, the ice thickness in summer and spring is almost uniformly distributed, while in August and Winter, high RFs are more found in thin ice bins. In statistics, the seasonal mean sea ice thickness are 2.06 m for spring, 2.11 m for summer, 1.32 m for autumn and 1.43 m for winter over the entire outlet, respectively. The mean fraction (approximately more than 7370% of zonal gate) of spring and summer sea ice thickness thicker than 2 m is larger than other seasons during the study period (except the summer of 2011). The RF of sea ice thickness along the meridional gate also shows the major fractions appearing in the spring and summer. In addition, the values of seasonal mean sea ice thickness are 2.06 m for spring, 2.11m for summer, 1.32 m for autumn and 1.43 m for winter over the entire outlet, respectively. Nevertheless, the mean relative frequency of sea ice drift distribution (Figure 9) shows that the ratio of summer sea ice drift lower than 6 km d<sup>-1</sup> is in the majority (approximately more than 9093% of zonal gate), indicating that the sea ice drift is much slower than other seasons. Also, the ice drift along the zonal gate is usually faster than the meridional gate and the meridional sea ice velocities are slower than 6 km d<sup>-1</sup> during summer. The seasonal mean sea ice velocity over the entire gate is larger than 5 km d<sup>-1</sup> except that is 3 km d<sup>-1</sup> in summer. The seasonal mean sea ice velocity over the entire gate is larger than 5 km d<sup>-1</sup> except the 3 km d<sup>-1</sup> during summer. And it can be found that the spring and winter ice concentration along the zonal gate is larger than that of summer and autumn.

### 3.3 Sea ice volume export through the Fram Strait

In this section, sea ice volume export over all seasons is investigated. Firstly, the examination of monthly Arctic sea ice volume export through the Fram Strait is demonstrated in Table 2. Both our results and Ricker et al. (2018) find that the maximum monthly sea ice export takes place in March 2011. The maximum of CMST data is -442 km<sup>3</sup> (notice that the negative values represent ice volume loss from the Arctic Basin through the outlet) that is less than that (-540 km<sup>3</sup>) of Ricker et al. (2018). Consistently, the lowest sea ice output for each study occurs in February 2011 when excluding the melt season (May-September). The minimum of the results shown in Ricker et al. (2018) is -21 km<sup>3</sup> while that is -34 km<sup>3</sup> in CMST data. Although

there are some differences in flux calculated based on CMST data and CryoSat-2 thickness and OSISAF drift data, both the estimations show a similar trend in annual cycle. Furthermore, the CMST data can provide sea ice variables (e.g., sea ice thickness, concentration and drift) in the melt season that remote sensing retrieval data cannot cover. Taking advantage of CMST data, this study is trying to fill the research gap in the summer sea ice volume export. It is found that another minimum of ice export occurs in August 2015 because of the rather slow mean sea ice velocity (shown in Figure 11) during the study period. The minimum value for CMST is  $-11 \text{ km}^3$  that is  $10 \text{ km}^3$  less than  $-21 \text{ km}^3$  (R) in February 2011 and  $23 \text{ km}^3$  less than that for M2.

Moreover, the seasonal variation of sea ice export through Fram Strait is shown in Figure 10. The ice volume output shows a significant seasonal variation. The seasonal maximums are found in spring of all years (2011-2016) and the low values usually occur in summer and autumn. The maximum seasonal ice export of  $-9703 (\pm 6059) \text{ km}^3$  (sea ice volume export has been rounded off to significant figures in seasonal and interannual time scales) takes place in the spring of 2012 owing to both synchronously simultaneously faster ice drift and thickness than other springs (shown in Figure 9), while the minimum flux of  $-2404 (\pm 403) \text{ km}^3$  occurs in autumn of 2016 caused by simultaneously synchronously rather slower ice motion than other autumns (shown in Figure 9) and thickness. Unlike other autumn ice export, the ice volume export of autumn 2013 abnormally increases and reaches  $-6204 (\pm 60) \text{ km}^3$ . This abnormal increase can be also explained by the faster ice drift (shown in Figure 9Figure 9).

Furthermore, we standardize the sea ice volume export, ice drift and thickness and then calculate the correlations of determination ( $R^2$ ) between monthly sea ice volume export and thickness, and also for drift (shown in Figure 11).  $R^2$  between monthly mean sea ice flux and drift is 0.77, which is much higher than  $R^2(Q_{EX}, \text{thickness}) = 0.16$ . This result shows that the sea ice drift variation contributes more to sea ice flux variation on its monthly variability. However, when averaged over seasonal time scale, both the sea ice drift and thickness become significant factors for their close  $R^2$  within the range of 0.36-0.46. Analogously, this conclusion was pointed out by Ricker et al., (2018) and Haibo Bi et al., (2016). In addition, the ~~climate indexes such as~~ Arctic Oscillation (AO) and North Atlantic Oscillation (NAO) index are used to analyze the possible links between atmospheric circulation modulation and sea ice volume flux through the Fram Strait (Figure 12). The AO and NAO index is interpreted as the surface pressure modulation in the strength of polar vortex aloft (Thompson and Wallace, 1998) and download from NOAA (https://www.cpc.ncep.noaa.gov/products/precip/CWlink/daily\_ao\_index/ao.shtml). The NAO index can be defined as sea level pressure (SLP) oscillation between Lisbon, Portugal and Stykkisholmur Iceland (Hurrell 1995) and

are both downloaded from National Oceanic and Atmospheric Administration (NOAA) (https://www.cpc.ncep.noaa.gov/products/precip/CWlink/pna/nao.shtml). Meanwhile, the AO/NAO index is most dominant in winter. We calculate ~~thesethe~~ the monthly seasonal mean AO and NAO index as seasonal mean and find that the correlation of ( $r = 0.55$ ) between AO index and ice volume flux against AO index (0.55) is higher than that against NAO index ( $r(Q_{EX}, \text{NAO}) = 0.34$ ). Both of our study and Ricker et al. (2018) find ~~that~~ that the AO may play a more important impact influence on the sea ice export (2011-2016) more directly. though the correlations in this study are smaller than that Ricker et al., (2018) calculated during freezing season.

The CMST-based sea ice volume during both the melt season and the freezing season are first reported in this study. The estimations show that the mean ice volume export during the melt season is  $-750 \pm 117120$  km<sup>3</sup> which is about half of that during the freezing season ( $-15003 \pm 16058$  km<sup>3</sup>). Annually, sea ice volume export (Figure 13) is also calculated and varies from  $-1974 \pm 1970$  ( $\pm 291290$ ) to  $-2491 \pm 2490$  ( $\pm 280$ ) km<sup>3</sup>. It is verified again that the annual sea ice volume export through the Fram Strait does not show a significant growth or decline trend (Ricker et al., 2018; Spreen et al., 2009). And the minimum yearly ice volume export occurs in the year of 2013 while the ice volume export reaches its maximum in 2012. This decline in ice volume export derives from both mean thickness and drift speed drop through the Fram Strait.

#### 4 Discussions

The ensemble standard deviation (SD) map of CMST ice concentration, thickness and drift shows that uncertainties are larger downstream the east of Greenland (Figures 14). So, following Krumpfen et al. (2016) and Ricker et al. (2018), a different gateway over the Fram Strait that consists of a zonal gate and a meridional gate located at a slightly higher latitude comparing to previous studies is chosen (Kwok et al., 2004; Kwok and Rothrock, 1999; Spreen et al., 2009). Alternatively, the choice of lower latitude gate at 79°N (e.g., the ULS moored sites) is suggested to utilize the ULS thickness for rough volume flux calculation when ice thickness data is unavailable. It should be noted that the different locations of Fram Strait gate and study period will introduce deviations on ice volume estimation (Krumpfen et al., 2016; Kwok et al., 2004; Kwok and Rothrock, 1999; Mu et al., 2017; Ricker et al., 2018; Spreen et al., 2009). ~~The bottom melting and underestimation of sea ice motion will result in lower estimation of ice volume flux if a lower latitude gate is used (Spreen et al., 2009; Wekerle et al., 2017).~~ For example, Ricker et al. (2018) investigated the sea ice flux in the Fram Strait and pointed out that the maximum ( $-540$  km<sup>3</sup>) occurs in March of 2011 and the minimum ( $-21$  km<sup>3</sup>) appears in February of 2011 from 2010 to 2017. However, on the different gate and period, Spreen et al. (2009) showed a relatively low maximum volume export of  $-420$  km<sup>3</sup> and relatively high minimum flux ( $-92$  km<sup>3</sup>) in the freezing season.

We investigate the similar period with Ricker et al. (2018), but further extend the sea ice volume flux estimation to include the summer seasons. Also, the CMST sea ice thickness data used in this study are evaluated to be reasonable when compared with in-situ observations (Mu et al., 2018a). The other important driver (sea ice drift) of ice volume export has also been compared with OSI SAF drift used in former estimations (Ricker et al., 2018) [and Sentinel-1 SAR sea ice drift](#). The monthly mean ice drift of CMST and OSI SAF shows a good consistency (Figure 2d and Figure 7). Furthermore, the CMST ice drift can provide the absent values where remote sensing data cannot detect. The estimation of volume export in this study reveals a reasonable sea ice volume export all year round.

The nearly 6 years' ice volume export through the Fram Strait is calculated and shown in Table 2. Besides the ice volume export (R) of Ricker et al. (2018), we also calculate the export using OSI SAF drift and CMST thickness (M1) and CMST thickness and drift (M2), respectively. It can be concluded that R is larger than M1 and M2 because R is derived from thicker CS2 thickness (Figure 5) and relatively faster OSI SAF drift (Figure 7). In addition, M1 is generally larger than M2 due to the

faster ice motion for most periods. M2 is sometimes larger than M1 owing to the larger CMST ice motion than that of OSI  
350 SAF. For example, there are five months of M2 in the freezing season of 2014 that are larger than M1. One reason is that both  
M1 and M2 are based on the same CMST thickness but the CMST sea ice drift is faster than OSI SAF in the months of March,  
April and November.

We have calculated the ice export in the zonal gate and the meridional gate covering both the melt season and the freezing  
season, respectively. The ice volume export through the meridional outlet shows a more robust increase from autumn to spring  
355 while the annual mean meridional ice export is only 8% of zonal gate (shown in Figure 109). To further validate the sea ice  
volume export in the melt season, we compare our CMST-based volume flux (e.g., M2) with the relative short-term summer  
ice volume flux that Krumpen et al. (2016) derived from airborne ice thickness and NSIDC ice drift data. The intercomparison  
shows that the sea ice volume export in August 2011 and July 2012 estimated by Krumpen et al. (2016) are smaller than this  
study. The underestimation of summer sea ice volume may deduce from a general underestimation of NSIDC drift during the  
360 melt season (Krumpen et al., 2016; Sumata et al., 2015; Sumata et al., 2014). Additionally, Kwok et al. (1999 and 2004)  
investigated the summer sea ice export by using ULS thickness and area flux in the freezing season. The average annual ice  
volume flux is  $-2218 \text{ km}^3 \text{ yr}^{-1}$  from 1991 to 1998 while the mean sea ice volume export from 1990 to 1995 is  $-2366 \text{ km}^3 \text{ yr}^{-1}$   
(Kwok et al., 2004; Kwok and Rothrock, 1999). The annual average volume flux in this study is  $-2254-2250 \text{ km}^3 \text{ yr}^{-1}$  that is  
similar to the volume flux from 1991 to 1998 (Kwok et al., 2004) and a little smaller than the period of 1990-1995 (Kwok and  
365 Rothrock, 1999). ~~For the purpose of straightforward comparison~~To compare with previous studies, we also calculate the sea  
ice volume flux through the Fram Strait gate located at  $79^\circ\text{N}$ , which completely follows~~The choice of this gate completely follows  
previous studies work (Kwok et al., 2004; Kwok and Rothrock, 1999; Vinje et al., 1998). and results are shown in Figure 15.~~  
Results (Figure 15) show that our annual mean sea ice volume export ( $-1352 \text{ km}^3$ ) is smaller than previous studies (Vinje et  
al. 1998, Kwok et al. 1999, Kwok et al. 2004), which is expected because of the decline of sea ice thickness in recent decade.  
370 All these works show consistent seasonality with maximum export in March and minimum export in August. Our annual mean  
sea ice volume export is only  $-1352 \text{ km}^3$  that is smaller than the volume flux calculated at the norther gate attributing to the  
bottom melting (Spreen et al., 2009; Wekerle et al., 2017). Also, our results are smaller than previous studies (Kwok et al.,  
2004; Kwok and Rothrock, 1999; Vinje et al., 1998). But all of these works show a consistent peak in March and a lowest ice  
volume export in August.~~In a recent study (Wei et al., 2019), Wei et al. (2019) calculates the annual mean sea ice volume  
export ( $-3216 \text{ km}^3 \text{ yr}^{-1}$ ) through the Fram Strait using MITgcm-ECCO2 during 1979 to 2012. Their estimations give a long  
375 period of sea ice volume export through the Fram Strait which can serve as an important reference when focusing on the long-  
term trend and variation of volume flux. However, this estimation derived from MITgcm-ECCO2 seems to overestimate the  
volume flux owing to the overestimations of sea ice drift and thickness (Wei et al., 2019). Therefore, the CMST data which  
assimilates CS2 and SMOS sea ice thickness and SSMIS sea ice concentration simultaneously have more advantages in  
calculating sea ice volume and extent export. Ricker et al. (2018) and Bi et al. (2018), gave their averaged freezing season  
380 volume export that are of  $-1711 \text{ km}^3$  and  $-1463 \text{ km}^3$ , respectively, based on the CS2 thickness data and different ice drift data  
over a similar period and outflow gates. Our average estimate of  $Q_{\text{EX,CMST,CMST}}$  (e.g., M2) based on the CMST ice thickness~~



and drift is ~~-1575-1580~~ km<sup>3</sup> while the  $Q_{EX, CMST, OSISAF}$  (e.g., M1) derived from CMST thickness and OSI SAF drift is ~~-1599~~  
385 ~~1600~~ km<sup>3</sup> in the freezing season. The similar results between M1 and M2 are because that the CMST drift are comparable with  
OSI SAF drift in the cold seasons. But more reliable validations of CMST ice drift need more in-situ records and more  
systematic evaluations.

#### 4 Conclusions

The daily CMST data over all seasons are first used to estimate ice volume export through the Fram Strait. Also, benefitting  
from the advantage of CMST data, the melt season (e.g. summer season and autumn season) ice volume export can be derived  
390 to fill the data gap over such periods. The entire seasonal and interannual variations of Arctic sea ice volume are helpful for  
communities that focus on climate teleconnection between Polar regions and low latitudes, Arctic freshwater transport and  
ocean circulation. Conclusions of this study can be drawn as follows:

- (1) The Arctic sea ice thickness and volume show a significant seasonal variation. The thickness and volume maximum usually  
occur in spring and the Arctic sea ice volume hits its minimum in autumn 2011 during the study period.
- 395 (2) Along the entire Fram Strait gate, the relative standard deviation (RSD) of ice drift (0.50) is greater than the RSD of ice  
thickness (0.30) and concentration (0.14), ~~),~~ demonstrating that ice drift is a main driver of ice volume export through the Fram  
Strait. The correlations of determination ( $R^2$ ) also show that sea ice drift is a much more important contributor for sea ice  
volume export ~~in on its annual~~ monthly variability-eyele.
- (3) The mean sea ice volume export during the melt season is around ~~-751-750~~ (~~±117120~~) km<sup>3</sup> which is about 50% of that  
400 during the freezing season (~~-1503-1500~~ ~~±158-160~~ km<sup>3</sup>). The lowest and largest annual sea ice volume export occur in 2013 and  
2012, respectively. Seasonal sea ice volume export varies from ~~-244-240~~ (~~±4340~~) to ~~-973-970~~ (~~±5960~~) km<sup>3</sup> while the monthly  
sea ice export varies between ~~-11-11~~ km<sup>3</sup> (August of 2015) and ~~-442-442~~ km<sup>3</sup> (March of 2011) during this study period. The  
abnormal ice volume export increase in autumn 2013 is primarily associated with the faster ice motion.
- (4) Seasonal variations of relative frequency (RF) of CMST sea ice thickness show that the mean fraction of spring and summer  
405 sea ice that is thicker than 2 m is larger than other seasons ~~mean summer thickness thicker than 2 m (73% of zonal gate) through~~  
~~Fram Strait is more than other seasons (except the summer of 2011).~~ The mean ratio of summer season ice drift (~~93% of zonal~~  
~~gate~~) ~~lower than 6 km d<sup>-1</sup> is in the majority.~~ And the abnormal ice volume export increase in autumn 2013 is speculated to the  
faster ice motion.

The long-term series of sea ice volume export are more important for ocean-climate analysis. An updated and improved CMST  
410 V2 sea ice data will be developed in the near future, so that a longer ice volume exported estimations can be expected.

*Data availability.* The CMST sea ice thickness data are available at <https://doi.pangaea.de/10.1594/PANGAEA.891475> (Mu et al., 2018,  
last access: 2 April 2019) and the CMST sea ice drift data are submitted to PANGAEA and under processing. The OSI SAF drift data can  
be download at <http://www.osi-saf.org/?q=content/sea-ice-products> (last access: 1 January 2019). The latest released Polar Pathfinder Daily

25 km EASE-Grid sea ice drift data are provided by the National Snow and Ice Data Center (NSIDC, <https://nsidc.org/data/nsidc-0116/versions/4>, last access: 2 May 2019). [The Sentinel-1 SAR sea ice drift data can be download at \(https://www.ncbi.nlm.nih.gov/pmc/articles/PMC5999601/, last access: 7 Sep 2019\)](https://www.ncbi.nlm.nih.gov/pmc/articles/PMC5999601/). The helicopter-borne electromagnetic induction sounding (HEM) sea ice thickness are available at <https://data.npolar.no/dataset/1ed8c57e-8041-42fd-95bb-cfe4e181e9b8> <https://www.nordatanet.no/en> (last access: 3 May 2019). [The AO and NAO index can be download at https://www.cpc.ncep.noaa.gov/products/precip/CWlink/daily\\_ao\\_index/ao.shtml](https://www.cpc.ncep.noaa.gov/products/precip/CWlink/daily_ao_index/ao.shtml) and [https://www.cpc.ncep.noaa.gov/products/precip/CWlink/daily\\_ao\\_index/ao.shtml](https://www.cpc.ncep.noaa.gov/products/precip/CWlink/daily_ao_index/ao.shtml) (last access: 8 September, 2019).

*Author contributions.* LM and QY conceptualized this study and provided the CMST sea ice data. CM conducted this study and performed the calculation. RR supplied the sea ice data of Ricker et al. (2018) for intercomparison. CM wrote this manuscript. LM, QY and RR polished this manuscript and improved the readability. QS, RW, BH and JL reviewed this manuscript.

*Competing interests.* The Authors declare that they have no conflict of interests.

*Acknowledgement.* This is a contribution to the Year of Polar Prediction (YOPP), a flagship activity of the Polar Prediction Project (PPP), initiated by the World Weather Research Programme (WWRP) of the World Meteorological Organization (WMO). Thanks are given to Yongwu Xiu, Ran Yang from School of Atmospheric Sciences, Sun Yat-sen University for the discussions. We also thank Yu Liang at Key laboratory of Marine Geology and Environment, Institute of Oceanology, Chinese Academy of Sciences for her advice and E. Hansen at Norwegian Polar Institute for providing the ULS data. This study is supported by [the National Natural Science Foundation of China \(No. 41922044\)](#), National Key R&D Program of China (2018YFA0605901), the Opening fund of State Key Laboratory of Cryospheric Science (SKLCS-OP-2019-09), the Federal Ministry of Education and Research of Germany in the framework of SSIP (grant01LN1701A), and the National Natural Science Foundation of China (41776192, 41706224).

## References

- Bi, H., Wang, Y., Zhang, W., Zhang, Z., Liang, Y., Zhang, Y., Hu, W., Fu, M., and Huang, H.: Recent satellite-derived sea ice volume flux through the Fram Strait: 2011–2015, *Acta Oceanol. Sin.*, 37, 107-115, doi:10.1007/s13131-018-1270-9, 2018.
- Bi, H., Huang, H., Fu, M., Fu, T., Zhou, X., and Xu, X.: Estimating sea-ice volume flux out of the Laptev Sea using multiple satellite observations, *Polar Res.*, 35, 24875, doi: 10.3402/polar.v35.24875, 2016.
- Chen, S., Gourley, J. J., Hong, Y., Kirstetter, P. E., Zhang, J., Howard, K., Flamig, Z. L., Hu, J., and Qi, Y.: Evaluation and Uncertainty Estimation of NOAA/NSSL Next-Generation National Mosaic Quantitative Precipitation Estimation Product (Q2) over the Continental United States, *J. Hydrometeorol.*, 14, 1308-1322, doi:10.1175/JHM-D-12-0150.1, 2013.
- Comiso, J. C. and Hall, D. K.: Climate trends in the Arctic as observed from space, *WIREs. Clim. Change*, 5, 389-409, doi:10.1002/wcc.277, 2014.
- Gregory, J. M., Stott, P. A., Cresswell, D. J., Rayner, N. A., Gordon, C., and Sexton, D. M. H.: Recent and future changes in Arctic sea ice simulated by the HadCM3 AOGCM, *Geophys. Res. Lett.*, 29, 28-21-28-24, doi:10.1029/2001GL014575, 2002.

- 445 Hansen, E., Gerland, S., Granskog, M. A., Pavlova, O., Renner, A. H. H., Haapala, J., Løyning, T. B., and Tschudi, M.: Thinning of Arctic sea ice observed in Fram Strait: 1990–2011, *J. Geophys. Res-Oceans.*, 118, 5202-5221, doi:10.1002/jgrc.20393, 2013.
- Krumpen, T., Gerdes, R., Haas, C., Hendricks, S., Herber, A., Selyuzhenok, V., Smedsrud, L., and Spreen, G.: Recent summer sea ice thickness surveys in Fram Strait and associated ice volume fluxes, *The Cryosphere*, 10, 523-534, doi:10.5194/tc-10-523-2016, 2016.
- Kwok, R. and Cunningham, G. F.: Variability of Arctic sea ice thickness and volume from CryoSat-2, *Philos. T. R. Soc. A.*, 373, 20140157, doi:10.1098/rsta.2014.0157, 2015.
- 450 Kwok, R., Cunningham, G. F., and Pang, S. S.: Fram Strait sea ice outflow, *J. Geophys. Res-Oceans.*, 109, doi:10.1029/2003JC001785, 2004.
- Kwok, R. and Rothrock, D. A.: Variability of Fram Strait ice flux and North Atlantic Oscillation, *J. Geophys. Res-Oceans.*, 104, 5177-5189, doi:10.1029/1998JC900103, 1999.
- 455 Lique, C., Treguier, A. M., Scheinert, M., and Penduff, T.: A model-based study of ice and freshwater transport variability along both sides of Greenland, *Clim. Dynam.*, 33, 685-705, doi: 10.1007/s00382-008-0510-7, 2009.
- Losch, M., Menemenlis, D., Campin, J.-M., Heimbach, P., and Hill, C.: On the formulation of sea-ice models. Part 1: Effects of different solver implementations and parameterizations, *Ocean. Model.*, 33, 129-144, doi:10.1016/j.ocemod.2009.12.008, 2010.
- Marshall, J., Adcroft, A., Hill, C., Perelman, L., and Heisey, C.: A finite-volume, incompressible Navier Stokes model for studies of the ocean on parallel computers, *J. Geophys. Res-Oceans.*, 102, 5753-5766, doi:10.1029/96JC02775, 1997.
- 460 Meier, W. N., Hovelsrud, G. K., van Oort, B. E. H., Key, J. R., Kovacs, K. M., Michel, C., Haas, C., Granskog, M. A., Gerland, S., Perovich, D. K., Makshtas, A., and Reist, J. D.: Arctic sea ice in transformation: A review of recent observed changes and impacts on biology and human activity, *Rev. Geophys.*, 52, 185-217, doi:10.1002/2013RG000431, 2014.
- Miller, P. A., Laxon, S. W., Feltham, D. L., and Cresswell, D. J.: Optimization of a Sea Ice Model Using Basinwide Observations of Arctic Sea Ice Thickness, Extent, and Velocity, *J. Climate.*, 19, 1089-1108, doi:10.1175/JCLI3648.1, 2006.
- 465 Mu, L., Losch, M., Yang, Q., Ricker, R., Losa, S. N., and Nerger, L.: Arctic-Wide Sea Ice Thickness Estimates From Combining Satellite Remote Sensing Data and a Dynamic Ice-Ocean Model with Data Assimilation During the CryoSat-2 Period, *J. Geophys. Res-Oceans.*, 123, 7763-7780, doi:10.1029/2018JC014316, 2018a.
- Mu, L., Yang, Q., Losch, M., Losa, S. N., Ricker, R., Nerger, L., and Liang, X.: Improving sea ice thickness estimates by assimilating CryoSat-2 and SMOS sea ice thickness data simultaneously, *Q. J. Roy. Meteor. Soc.*, 144, 529-538, doi:10.1002/qj.3225, 2018b.
- 470 Mu, L., Zhao, J., and Zhong, W.: Regime shift of the dominant factor for halocline depth in the Canada Basin during 1990–2008, *Acta Oceanologica Sinica*, 36, 35-43, doi: 10.1007/s13131-016-0883-0, 2017.
- Muckenhuber, S., Korosov, A. A., and Sandven, S.: Open-source feature-tracking algorithm for sea ice drift retrieval from Sentinel-1 SAR imagery, *Cryosphere*, 10, 913-925, doi:10.5194/tc-10-913-2016, 2016.
- 475 Muckenhuber, S. and Sandven, S.: Sea ice drift data for Fram Strait derived from a feature-tracking algorithm applied on Sentinel-1 SAR imagery, *Data in Brief*, 18, 1410-1415, doi: 10.1016/j.dib.2018.04.034, 2018.
- Nguyen, A. T., Menemenlis, D., and Kwok, R.: Arctic ice-ocean simulation with optimized model parameters: Approach and assessment, *J. Geophys. Res-Oceans*, 116, doi:10.1029/2010JC006573, 2011.
- Parkinson, C. L. and Comiso, J. C.: On the 2012 record low Arctic sea ice cover: Combined impact of preconditioning and an August storm, *Geophys. Res. Lett.*, 40, 1356-1361, doi:10.1002/grl.50349, 2013.
- 480 Petty, A. A., Stroeve, J. C., Holland, P. R., Boisvert, L. N., Bliss, A. C., Kimura, N., and Meier, W. N.: The Arctic sea ice cover of 2016: a year of record-low highs and higher-than-expected lows, *The Cryosphere*, 12, 433-452, doi:10.5194/tc-12-433-2018, 2018.

- Ricker, R., Girard-Arduin, F., Krumpen, T., and Lique, C.: Satellite-derived sea ice export and its impact on Arctic ice mass balance, *Cryosphere*, 12, 3017-3032, doi:10.5194/tc-12-3017-2018, 2018.
- 485 Ricker, R., Hendricks, S., Girard-Arduin, F., Kaleschke, L., Lique, C., Tian-Kunze, X., Nicolaus, M., and Krumpen, T.: Satellite-observed drop of Arctic sea ice growth in winter 2015–2016, *Geophys. Res. Lett.*, 44, 3236-3245, doi:10.1002/2016gl072244, 2017.
- Schweiger, A., Lindsay, R., Zhang, J., Steele, M., Stern, H., and Kwok, R.: Uncertainty in modeled Arctic sea ice volume, *J. Geophys. Res-Oceans.*, 116, doi:10.1029/2011JC007084, 2011.
- Serreze, M. C., Barrett, A. P., Slater, A. G., Woodgate, R. A., Aagaard, K., Lammers, R. B., Steele, M., Moritz, R., Meredith, M., and Lee,  
490 C. M.: The large-scale freshwater cycle of the Arctic, *J. Geophys. Res-Oceans.*, 111, doi:10.1029/2005JC003424, 2006.
- Spreen, G., Kern, S., Stammer, D., and Hansen, E.: Fram Strait sea ice volume export estimated between 2003 and 2008 from satellite data, *Geophys. Res. Lett.*, 36, doi:10.1029/2009gl039591, 2009.
- Spreen, G., Kwok, R., and Menemenlis, D.: Trends in Arctic sea ice drift and role of wind forcing: 1992–2009, *Geophys. Res. Lett.*, 38, doi:10.1029/2011GL048970, 2011.
- 495 Stark, J. D., Ridley, J., Martin, M., and Hines, A.: Sea ice concentration and motion assimilation in a sea ice–ocean model, *J. Geophys. Res-Oceans.*, 113, doi:10.1029/2007JC004224, 2008.
- Stroeve, J. and Notz, D.: Insights on past and future sea-ice evolution from combining observations and models, *Global Planet. Change.*, 135, 119-132, doi: 10.1016/j.gloplacha.2015.10.011, 2015.
- Sumata, H., Kwok, R., Gerdes, R., Kauker, F., and Karcher, M.: Uncertainty of Arctic summer ice drift assessed by high-resolution SAR  
500 data, *J. Geophys. Res-Oceans.*, 120, 5285-5301, doi:10.1002/2015JC010810, 2015.
- Sumata, H., Lavergne, T., Girard-Arduin, F., Kimura, N., Tschudi, M. A., Kauker, F., Karcher, M., and Gerdes, R.: An intercomparison of Arctic ice drift products to deduce uncertainty estimates, *J. Geophys. Res-Oceans.*, 119, 4887-4921, doi:10.1002/2013JC009724, 2014.
- Tilling, R. L., Ridout, A., Shepherd, A., and Wingham, D. J.: Increased Arctic sea ice volume after anomalously low melting in 2013, *Nat. Geosci.*, 8, 643, doi:10.1038/Ngeo2489, 2015.
- 505 Wei, J., Zhang, X., and Wang, Z.: Reexamination of Fram Strait sea ice export and its role in recently accelerated Arctic sea ice retreat, *Clim. Dyn.*, doi:10.1007/s00382-019-04741-0 2019.
- Wekerle, C., Wang, Q., Danilov, S., Schourup-Kristensen, V., von Appen, W.-J., and Jung, T.: Atlantic Water in the Nordic Seas: Locally eddy-permitting ocean simulation in a global setup, *J. Geophys. Res-Oceans.*, 122, 914-940, doi:10.1002/2016JC012121, 2017.
- Yang, Q., Losa, S., Losch, M., Tian-Kunze, X., Nerger, L., Liu, J., Kaleschke, L., and Zhang, Z.: Assimilating SMOS sea ice thickness into  
510 a coupled ice-ocean model, using a local SEIK filter, *J. Geophys. Res-Oceans.*, 119, 6680-6692, doi:10.1002/2014JC009963, 2014.
- Yang, Q., Losa, S. N., Losch, M., Jung, T., and Nerger, L.: The role of atmospheric uncertainty in Arctic summer sea ice data assimilation and prediction, *Q. J. Roy. Meteor. Soc.*, 141, 2314-2323, doi:10.1002/qj.2523, 2015.
- Yang, Q., Losch, M., Losa, S. N., Jung, T., and Nerger, L.: Taking into Account Atmospheric Uncertainty Improves Sequential Assimilation of SMOS Sea Ice Thickness Data in an Ice–Ocean Model, *J. Atmos. Ocean. Tech.*, 33, 397-407, doi:10.1175/JTECH-D-15-0176.1, 2016.
- 515 Zamani, B., Krumpen, T., Smedsrud, L. H., and Gerdes, R.: Fram Strait sea ice export affected by thinning: comparing high-resolution simulations and observations, *Clim. Dynam.*, 53, 3257-3270, doi:10.1007/s00382-019-04699-z, 2019.
- Zhang, A., Xiao, L., Min, C., Chen, S., Kulie, M., Huang, C., and Liang, Z.: Evaluation of latest GPM-Era high-resolution satellite precipitation products during the May 2017 Guangdong extreme rainfall event, *Atmos. Res.*, 216, 76-85, doi: 10.1016/j.atmosres.2018.09.018, 2019.

**Table 1.** OSI SAF drift data used in this study for comparison.

| Name    | Product             | Original data                                                                       | Algorithm | Temporal resolution | Spatial Resolution | Period        |
|---------|---------------------|-------------------------------------------------------------------------------------|-----------|---------------------|--------------------|---------------|
| OSI SAF | OSI-405<br>(merged) | SSMIS (91 GHz,<br>DMSP F17),<br>ASCAT (Metop-<br>B), AMSR-2<br>(18.7 and 37<br>GHz) | CMCC      | 2 days              | 62.5 km            | 2010-<br>2016 |

**Table 2.** Monthly Arctic sea ice volume export through the Fram Strait in km<sup>3</sup> month<sup>-1</sup>.

|      |    | Jan  | Feb        | Mar         | Apr  | May  | Jun  | Jul  | Aug  | Sep  | Oct  | Nov  | Dec  |
|------|----|------|------------|-------------|------|------|------|------|------|------|------|------|------|
| 2010 | R  | —    | —          | —           | —    | —    | —    | —    | —    | —    | —    | -227 | -275 |
|      | M1 | —    | —          | —           | —    | —    | —    | —    | —    | —    | —    | -209 | -258 |
|      | M2 | —    | —          | —           | —    | —    | —    | —    | —    | -148 | -222 | -195 | -239 |
| 2011 | R  | -267 | <b>-21</b> | <b>-540</b> | -279 | —    | —    | —    | —    | —    | -164 | -214 | -354 |
|      | M1 | -238 | <b>-24</b> | <b>-478</b> | -255 | —    | —    | —    | —    | —    | -149 | -163 | -293 |
|      | M2 | -238 | <b>-34</b> | <b>-442</b> | -230 | -278 | -185 | -115 | -64  | -28  | -151 | -175 | -290 |
| 2012 | R  | -129 | -381       | -379        | -487 | —    | —    | —    | —    | —    | -203 | -182 | -187 |
|      | M1 | -109 | -299       | -287        | -428 | —    | —    | —    | —    | —    | -207 | -157 | -125 |
|      | M2 | -137 | -300       | -267        | -372 | -334 | -218 | -187 | -131 | -100 | -160 | -149 | -136 |
| 2013 | R  | -103 | -163       | -299        | -318 | —    | —    | —    | —    | —    | -215 | -400 | -231 |
|      | M1 | -80  | -122       | -254        | -254 | —    | —    | —    | —    | —    | -212 | -372 | -211 |
|      | M2 | -78  | -109       | -217        | -219 | -194 | -140 | -107 | -98  | -26  | -228 | -367 | -191 |
| 2014 | R  | -78  | -195       | -345        | -452 | —    | —    | —    | —    | —    | -200 | -165 | -373 |
|      | M1 | -49  | -105       | -240        | -401 | —    | —    | —    | —    | —    | -203 | -122 | -307 |
|      | M2 | -61  | -114       | -282        | -425 | -232 | -161 | -112 | -184 | -194 | -170 | -162 | -283 |
| 2015 | R  | -160 | -425       | -429        | -354 | —    | —    | —    | —    | —    | -52  | -261 | -275 |
|      | M1 | -129 | -358       | -328        | -284 | —    | —    | —    | —    | —    | -72  | -215 | -243 |

|      |           |      |      |      |      |      |      |      |            |      |      |      |      |
|------|-----------|------|------|------|------|------|------|------|------------|------|------|------|------|
|      | M2        | -129 | -355 | -339 | -308 | -171 | -240 | -114 | <b>-11</b> | -107 | -78  | -192 | -244 |
|      | <u>R</u>  | -177 | -352 | -348 | -310 | —    | —    | —    | —          | —    | -129 | -151 | -307 |
| 2016 | <u>M1</u> | -129 | -272 | -255 | -264 | —    | —    | —    | —          | —    | -98  | -90  | -243 |
|      | <u>M2</u> | -150 | -267 | -287 | -289 | -196 | -194 | -113 | -198       | -75  | -97  | -72  | -222 |



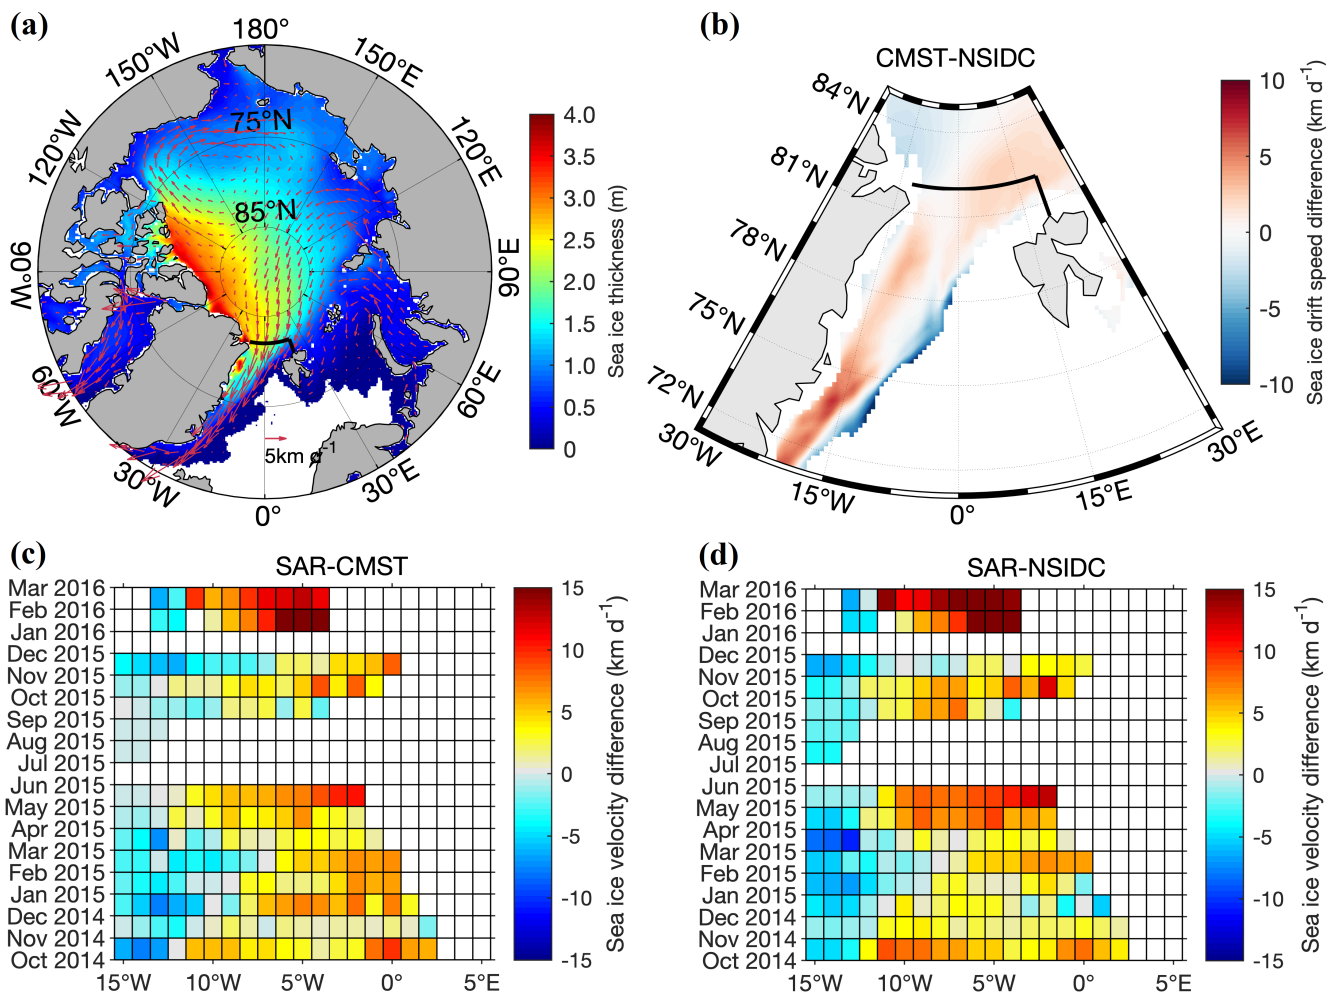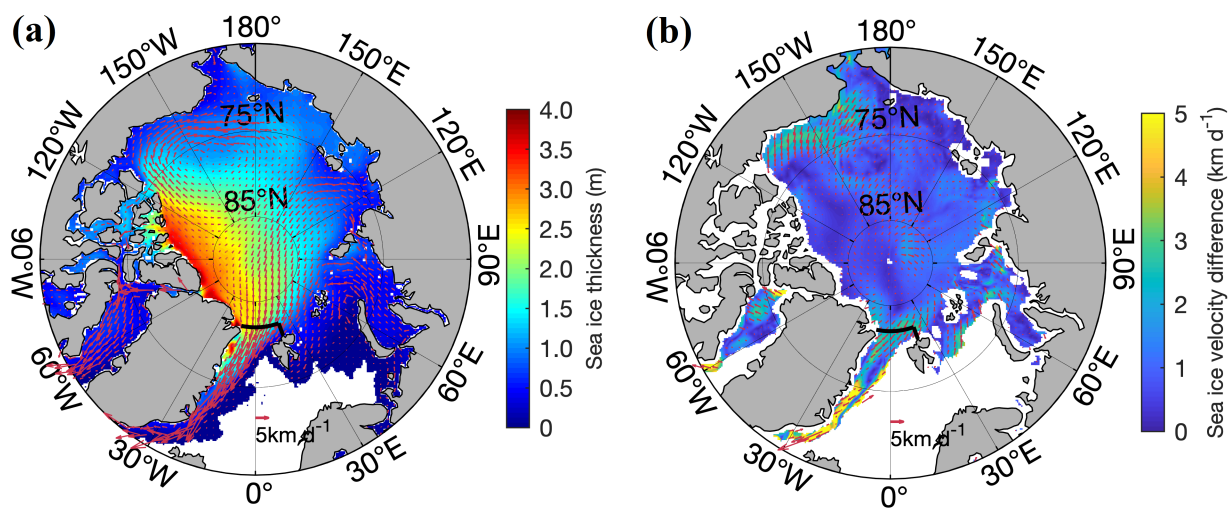

**Figure 1.** (a) The mean CMST sea ice drift and thickness averaged from September, 2010 to December, 2016. (b) The differences between CMST drift [speed](#) and NSIDC drift [speed](#), the background color represents the magnitudes of ice velocity difference during the same period. The thick black line represents zonal and meridional sea ice gates to derive sea ice volume flux through the Fram Strait. (c) [Meridional velocity difference between SAR drift and CMST drift at the Fram Strait \(79 °N\).](#) (d) [Meridional velocity difference between Sentinel-1 SAR drift and NSIDC drift at the Fram Strait \(79 °N\).](#)

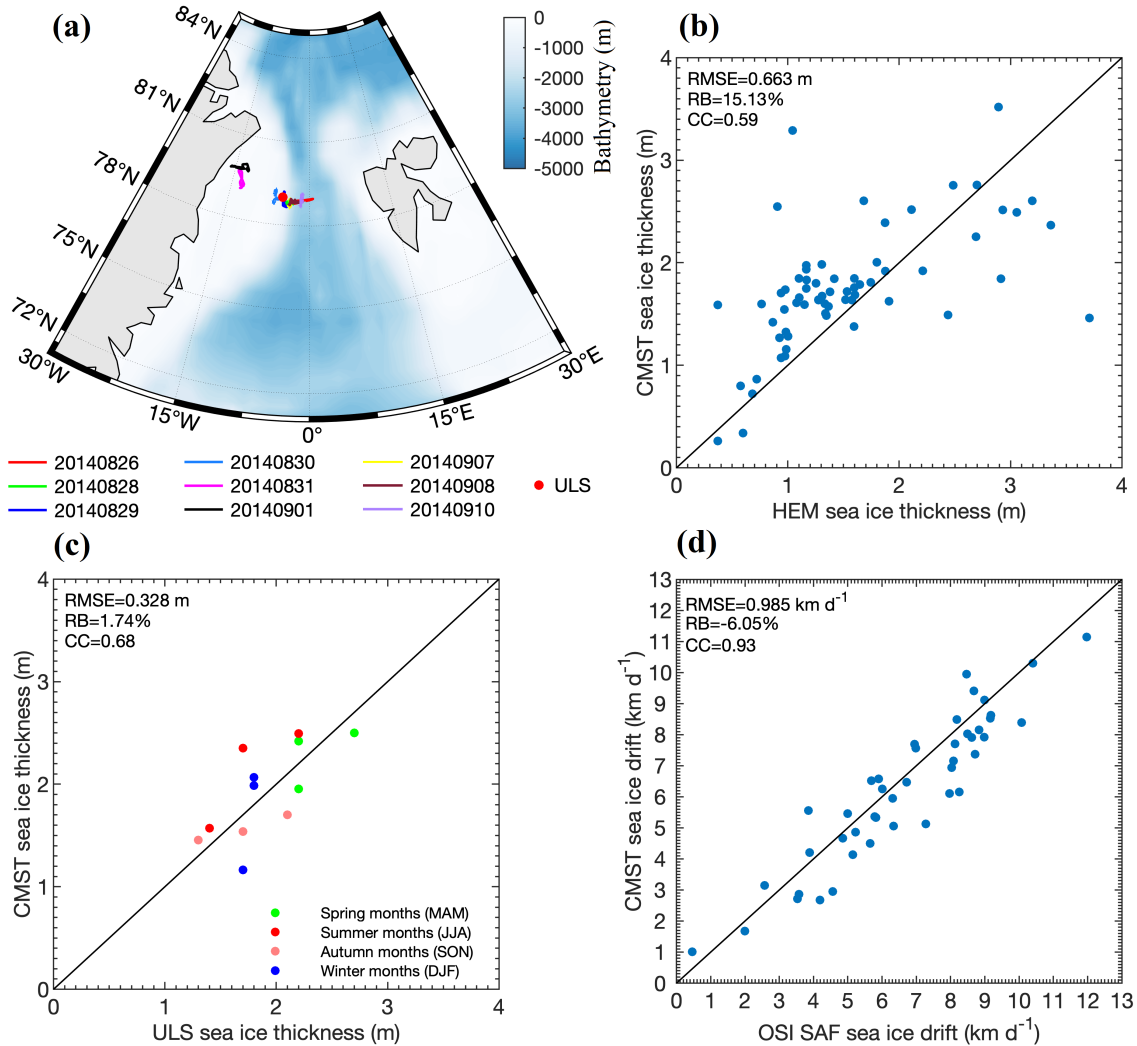

**Figure 2.** (a) The trajectories of 9 separate flights of HEM measurement campaigns carried out in the Fram Strait and the red dot denotes the site of ULS, -Scatter plots of (b) daily mean sea ice thickness derived from CMST and HEM data, (c) monthly mean sea ice thickness derived from CMST and ULS data, (d) monthly average sea ice drift based on CMST and OSI SAF.

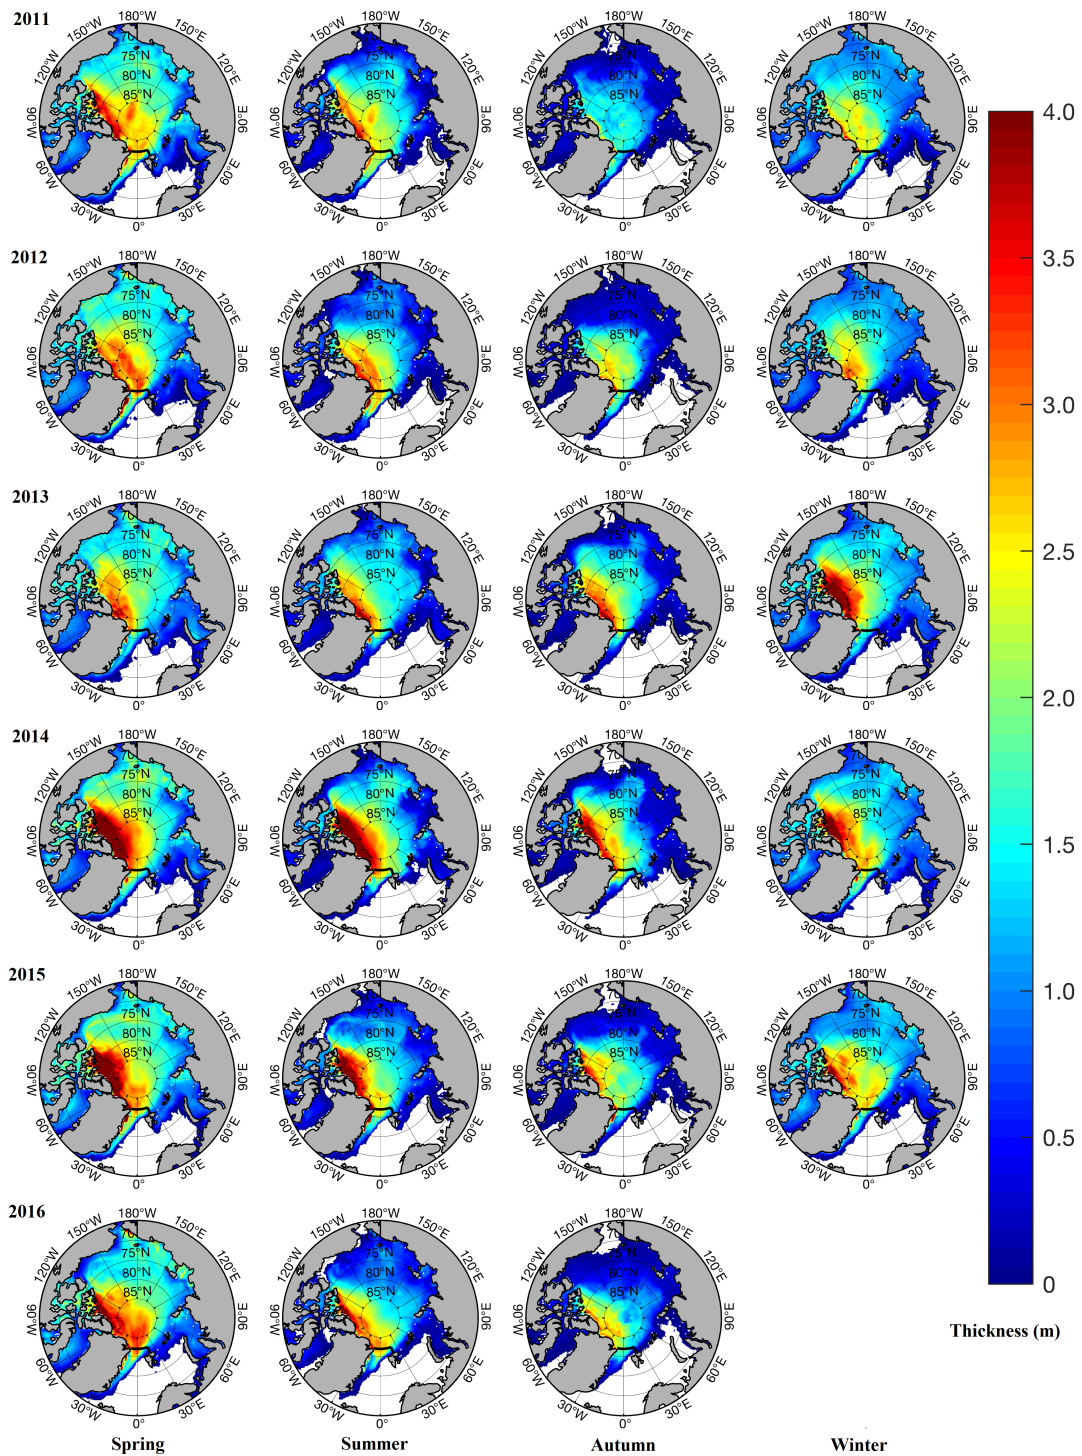

545

**Figure 3.** Seasonal variation of Arctic sea ice thickness. The thick black line represents the sea ice fluxgate in the Fram Strait used in this study.



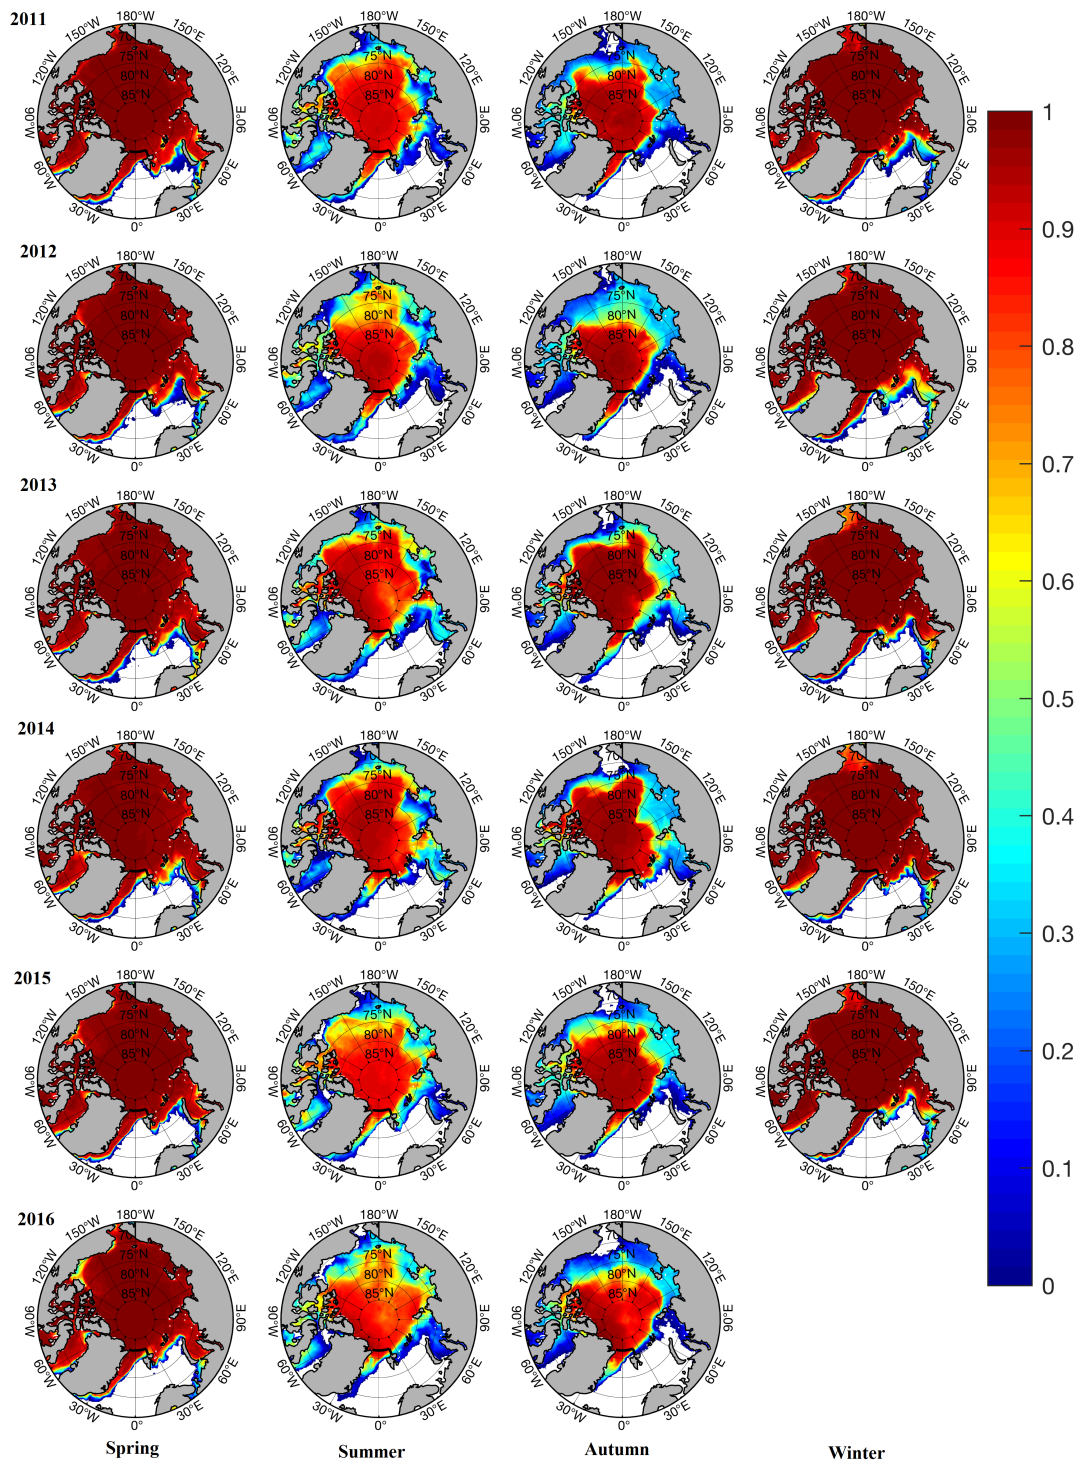

Figure 4. Seasonal variation of Arctic sea ice concentration. The thick black line represents the sea ice fluxgate in the Fram

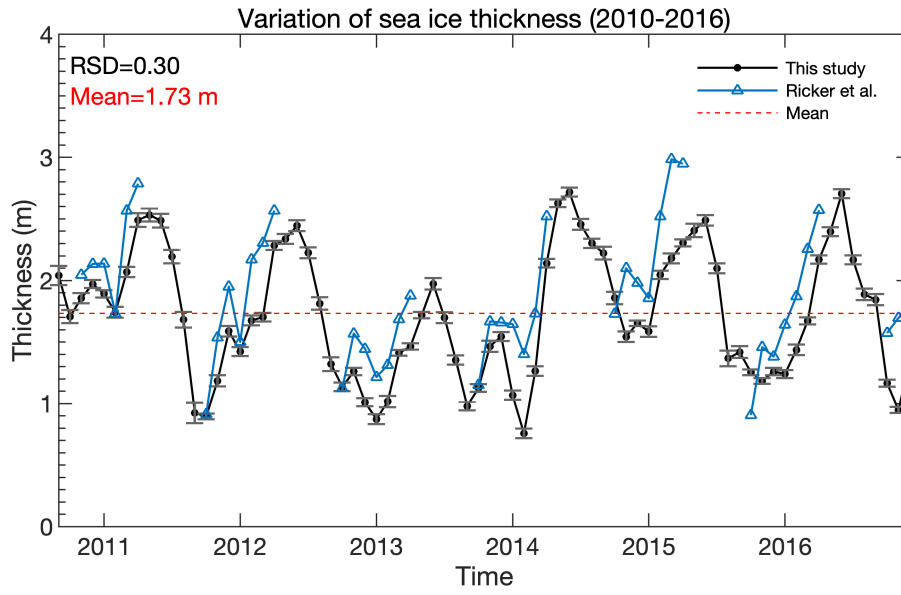

**Figure 5.** CMST sea ice thickness averaged over the entire Fram Strait gate, from September 2010 to December 2016. The black dotted line denotes monthly mean ice thickness based on CMST data with corresponding standard deviations while the blue dotted line represents monthly [mean effective sea ice thickness of Ricker et al. \(2018\)](#) [mean ice thickness of CS2](#).

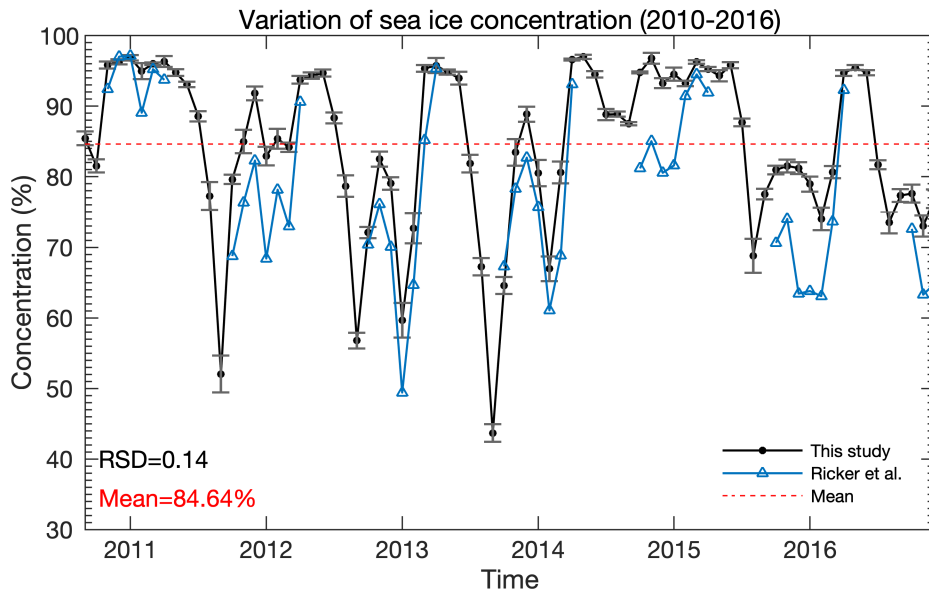

**Figure 6.** CMST sea ice concentration averaged over the entire Fram Strait gate, from September 2010 to December 2016. The black dotted line represents monthly mean ice concentration based on CMST data with corresponding standard deviations while the blue dotted line represents monthly mean ice concentration of OSI SAF.

555

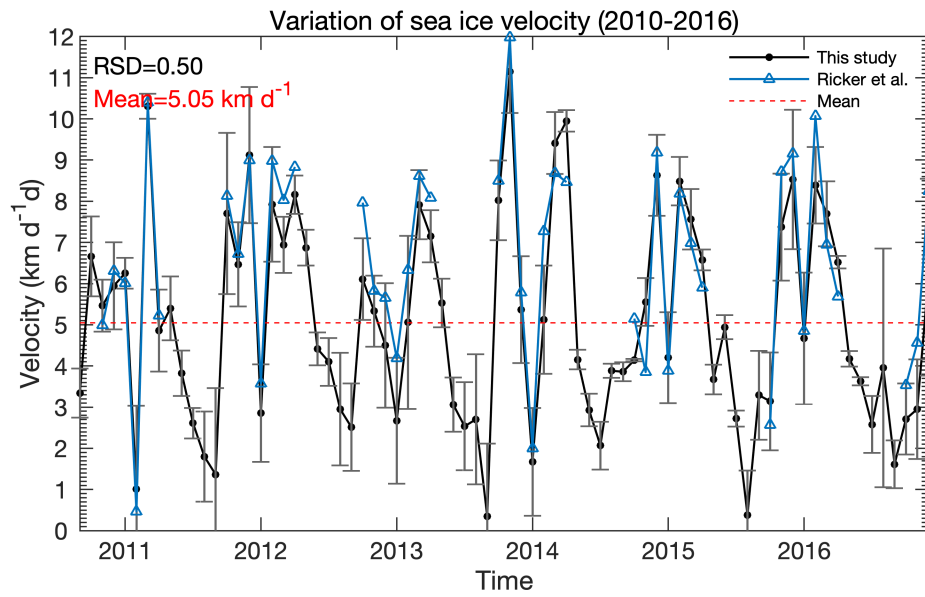

560 **Figure 7.** CMST sea ice drift averaged over the entire Fram Strait gate, from September 2010 to December 2016. The black dotted line represents monthly mean ice drift based on CMST data with corresponding standard deviations while the blue dotted line shows the monthly mean ice drift of OSI SAF.

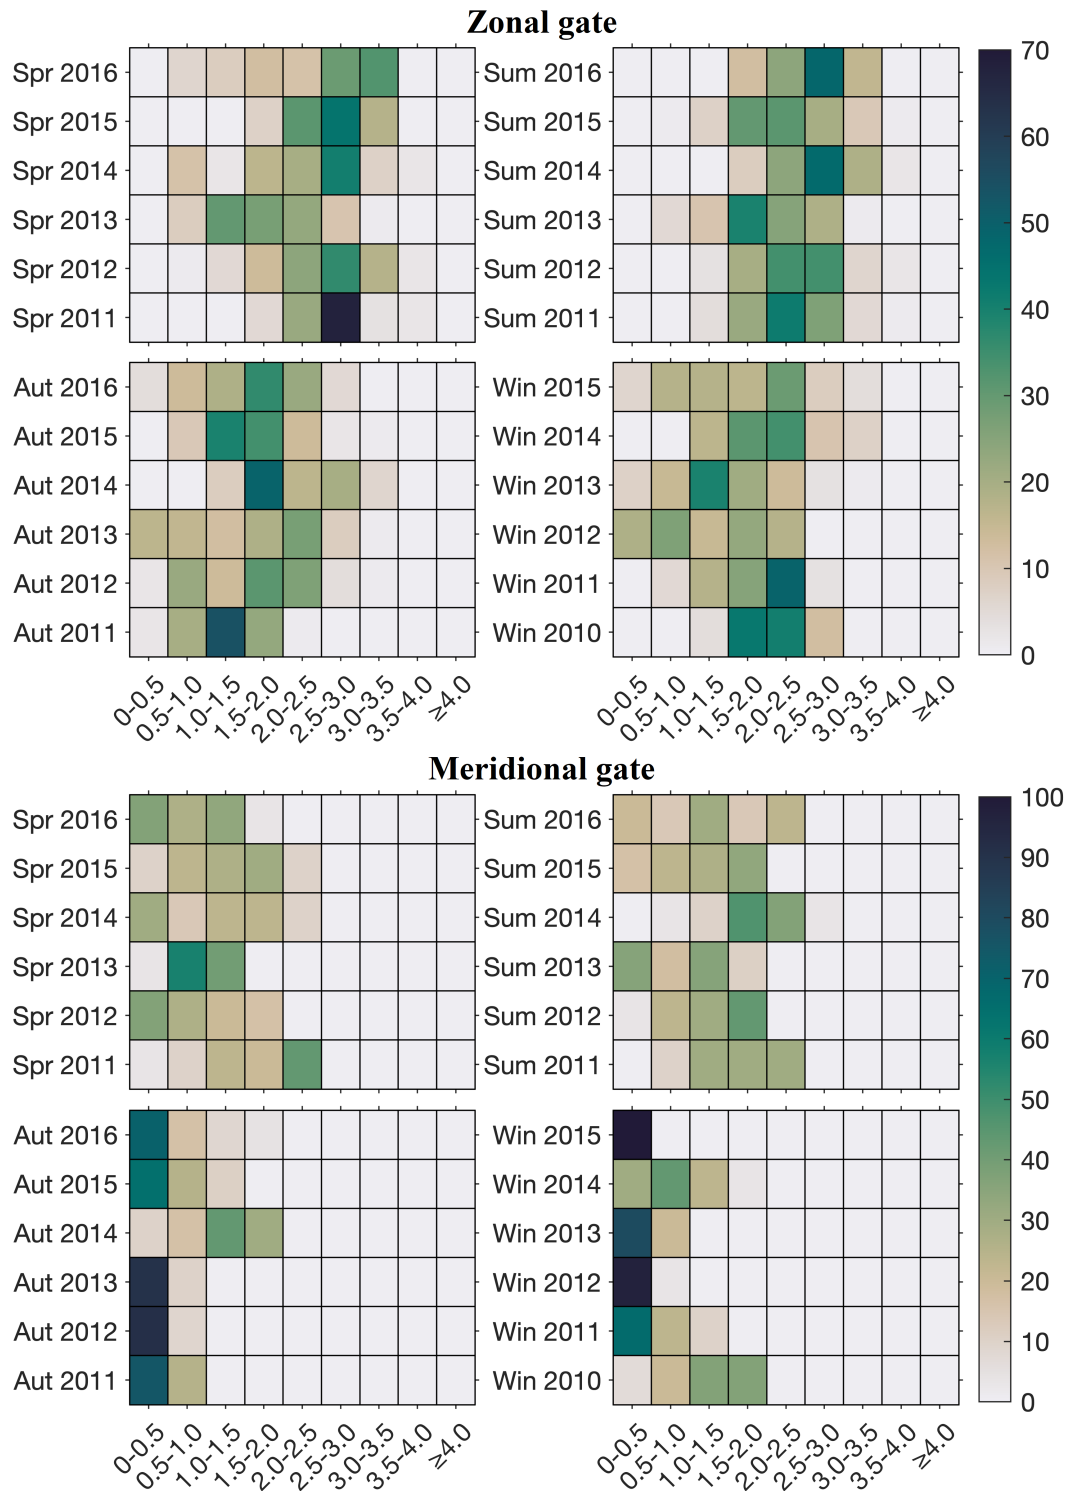

565 **Figure 8.** Seasonal variation of relative frequency (unit: %) of CMST sea ice thickness (unit: m) over the Fram Strait gate.

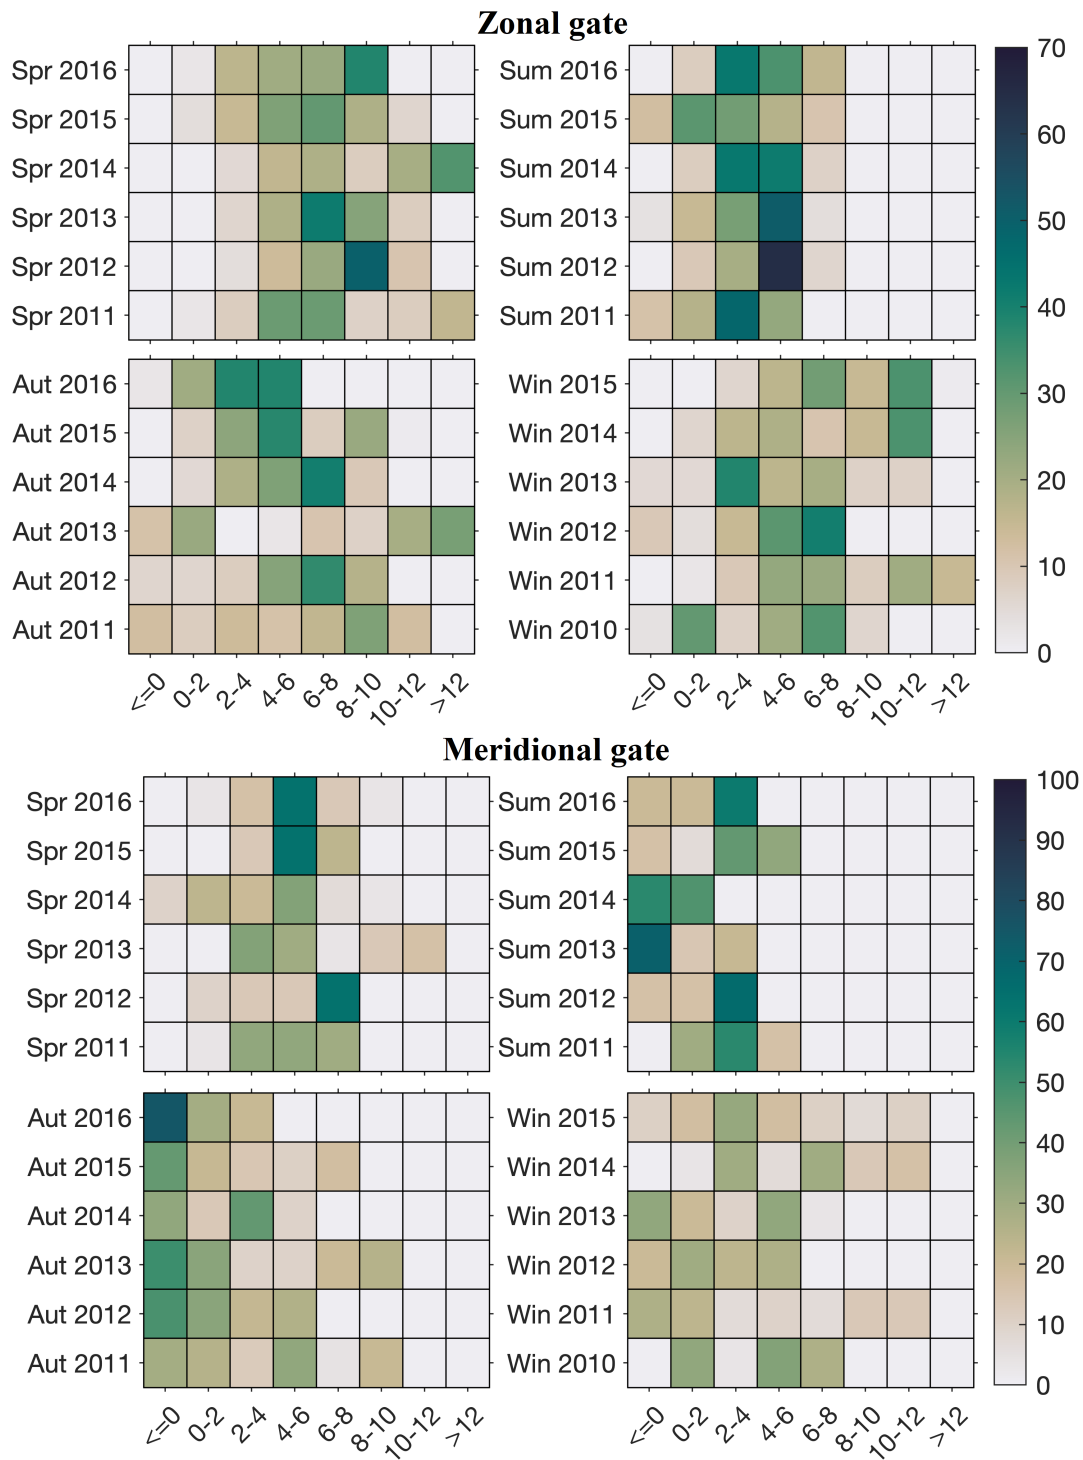

**Figure 2.** Seasonal variation of relative frequency (unit: %) of CMST sea ice drift (unit:  $\text{km d}^{-1}$ ) over the entire Fram Strait gate.



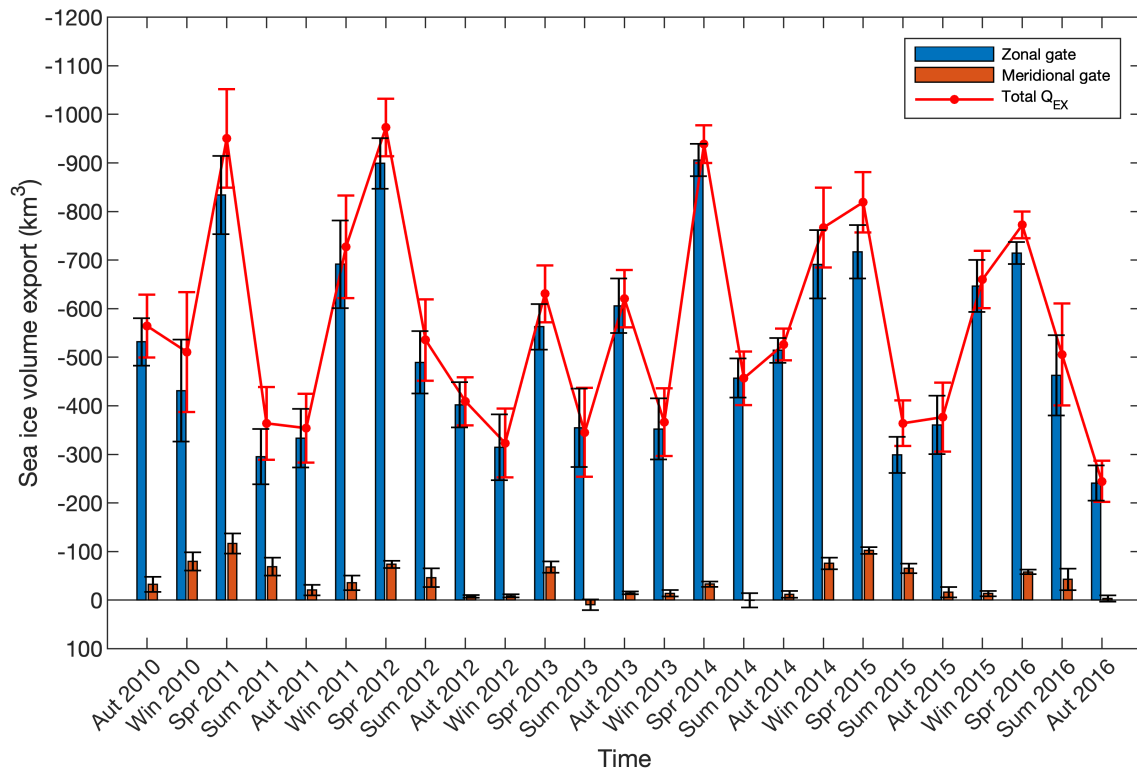

570 **Figure 10.** CMST seasonal Arctic sea ice volume export (unit:  $\text{km}^3$ ) through the Fram Strait with corresponding uncertainty.  $Q_{EX}$  represents the sea ice volume export based on CMST thickness and drift (similarly hereinafter).

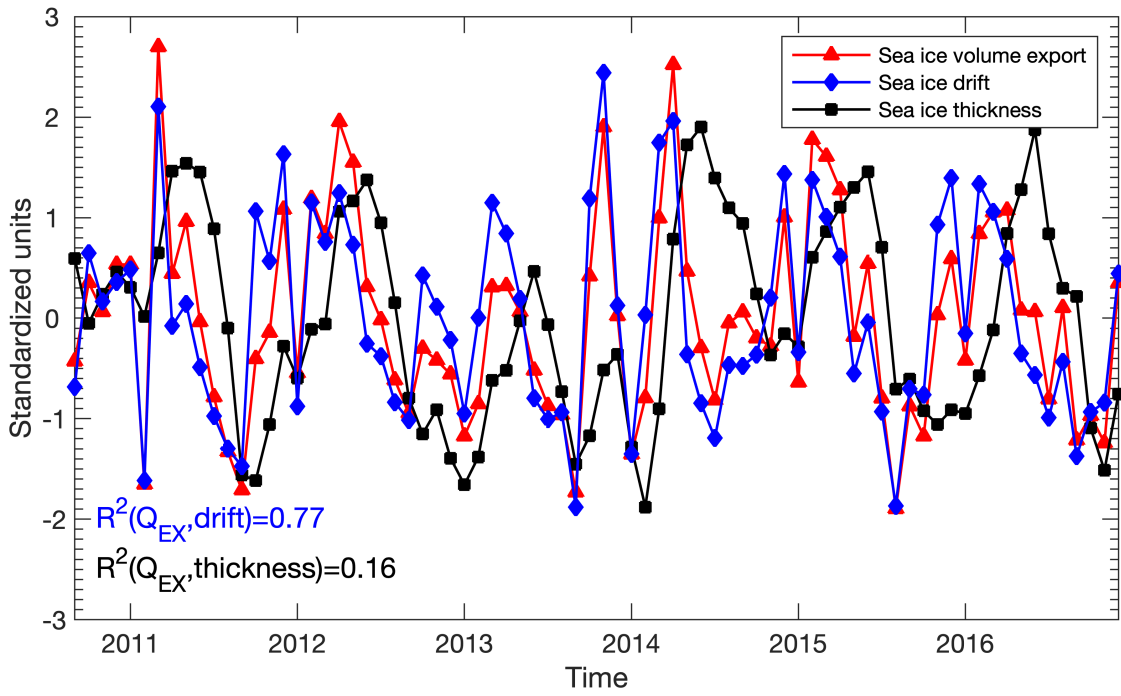

575 [Figure 11.](#) Time series of standardized monthly mean sea ice volume export (red line) and corresponding monthly mean sea ice drift (blue line) and sea ice thickness (black line), including correlation of determination ( $R^2$ ).

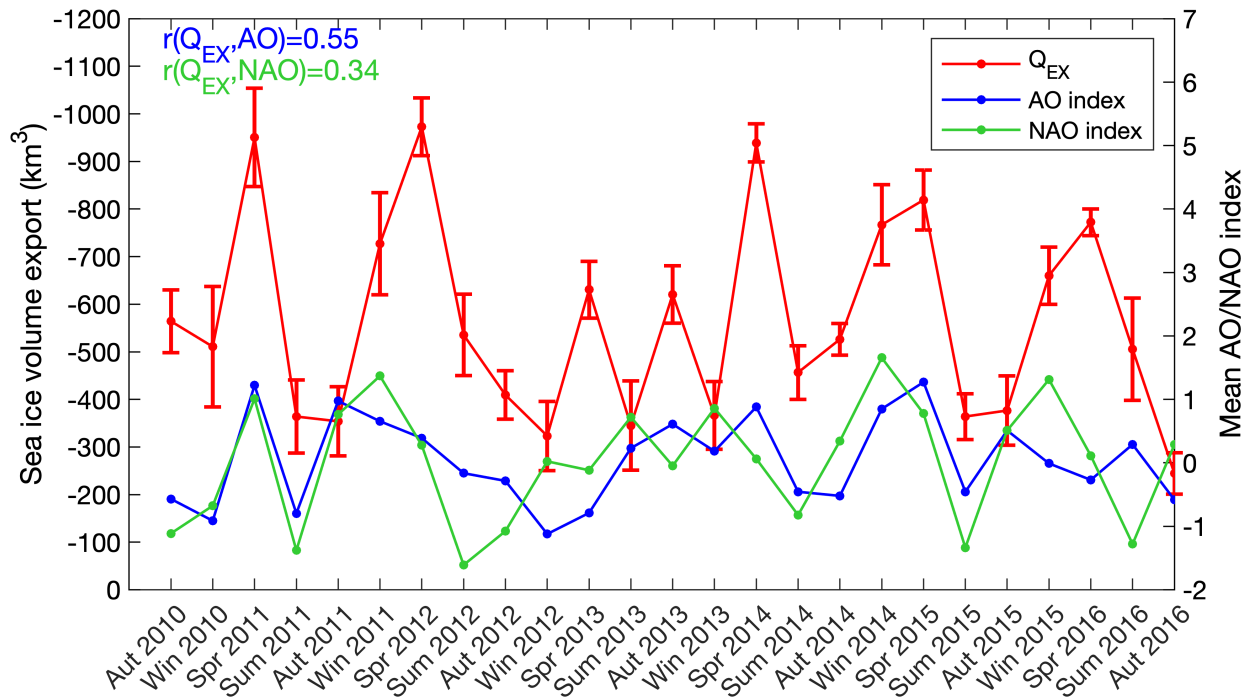

**Figure 12.** Time series of seasonal mean sea ice volume export (unit:  $\text{km}^3$ , red line) and corresponding mean seasonal AO (blue line) and NAO (green line) index, including correlation coefficient ( $r$ ).

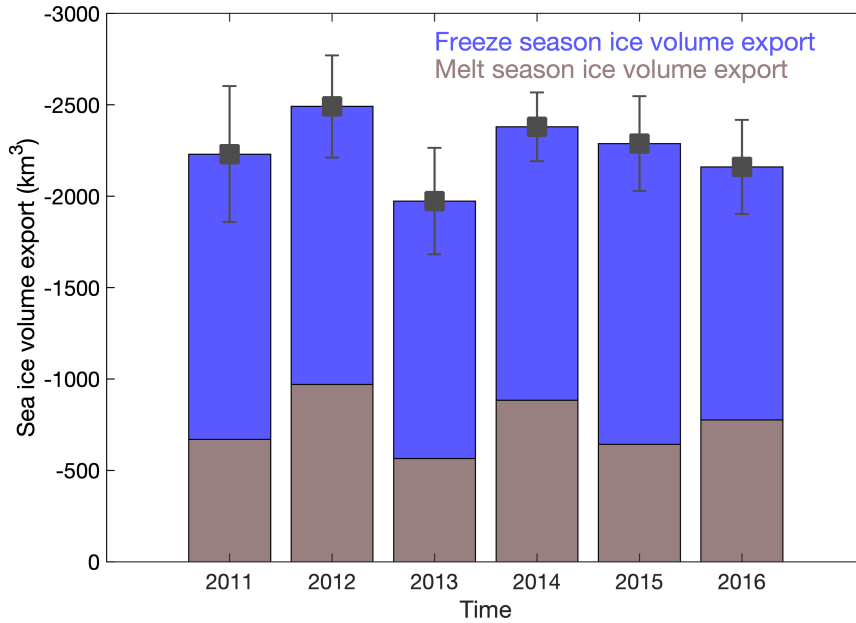

580

**Figure 13.** CMST interannual Arctic sea ice volume export (unit:  $\text{km}^3$ ) through the entire Fram Strait with corresponding uncertainty. The freezing season represents the months from October to April and the melt season is during May to September.

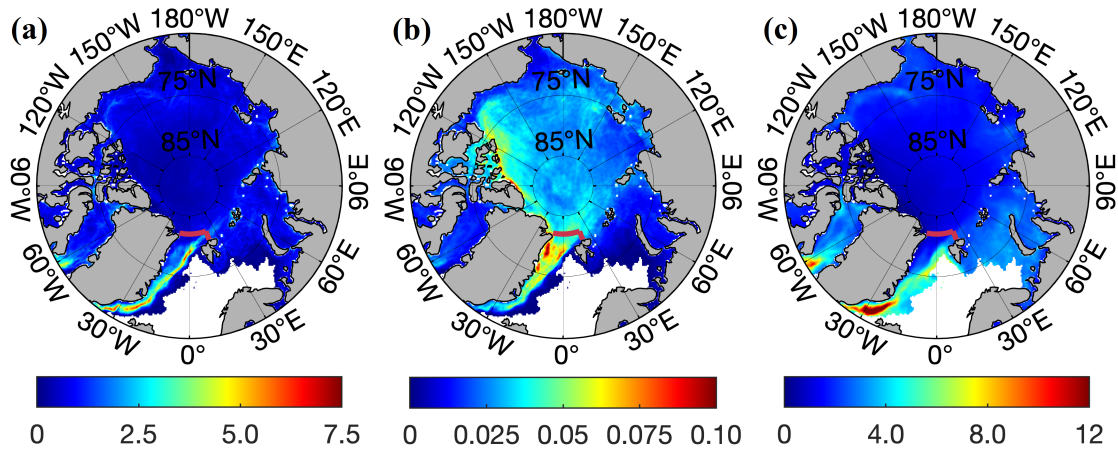

585

**Figure 14.** The mean ensemble standard deviation (SD) map of CMST (a) sea ice concentration (unit: %), (b) sea ice thickness (unit: m) and (c) sea ice drift (unit:  $\text{km d}^{-1}$ ) from September, 2010 to December, 2016. The thick red line represents zonal and meridional sea ice export gates to derive sea ice volume flux through the Fram Strait.

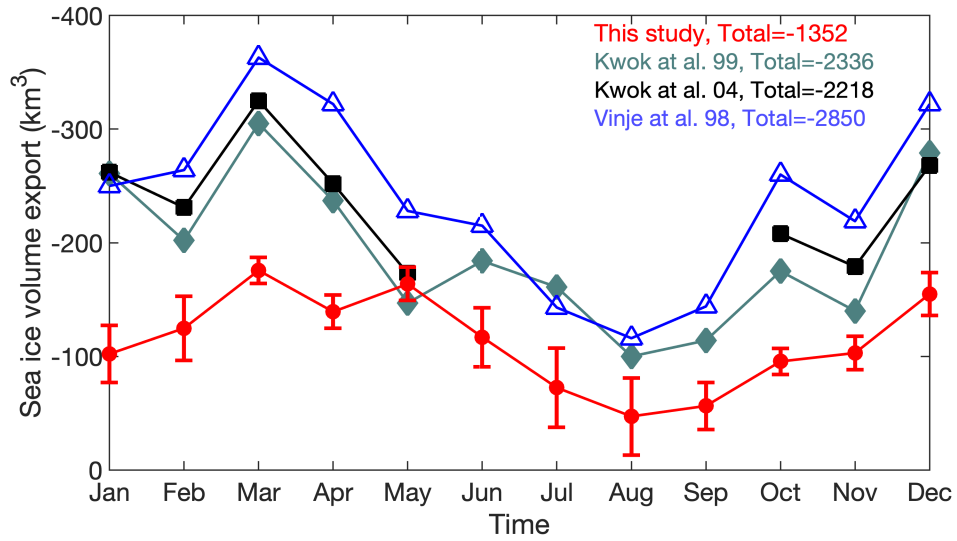

590 [Figure 15.](#) Mean monthly sea ice volume export (unit: km<sup>3</sup>) at 79°N transect in the Fram Strait from this study (red line), Kwok et al. (1999, dark green line), Kwok et al. (2004, black line) and Vinje et al. (1998, blue line).
